# Supplementary material
Source: PubMed Central journal article supplement (PMC4592855)
Supplement: AEM.01729-15_zam999116685so1.pdf [file AEM.01729-15_zam999116685so1.pdf]

## Supplementary materials

# **Molecular epidemiology of oyster-related human noroviruses: Global genetic diversity and temporal-geographical distribution during 1983 to 2014**

Yongxin Yu<sup>1,2</sup>, Hui Cai<sup>1,2</sup>, Linghao Hu<sup>1,2</sup>, Rongwei Lei<sup>1</sup>, Yingjie Pan<sup>1,2</sup>,

Shuling Yan<sup>1,3</sup>, Yongjie Wang<sup>1,2\*</sup>

<sup>1</sup> College of Food Science and Technology, Shanghai Ocean University, Shanghai, China;

<sup>2</sup> Laboratory of Quality and Safety Risk Assessment for Aquatic Products on Storage & Preservation (Shanghai), Ministry of Agriculture, China;

<sup>3</sup> Institute of Biochemistry and Molecular Cell Biology, University of Goettingen, Goettingen, Germany.

**Figure S1** Emergence and prevalence of NoV GII.4 variants

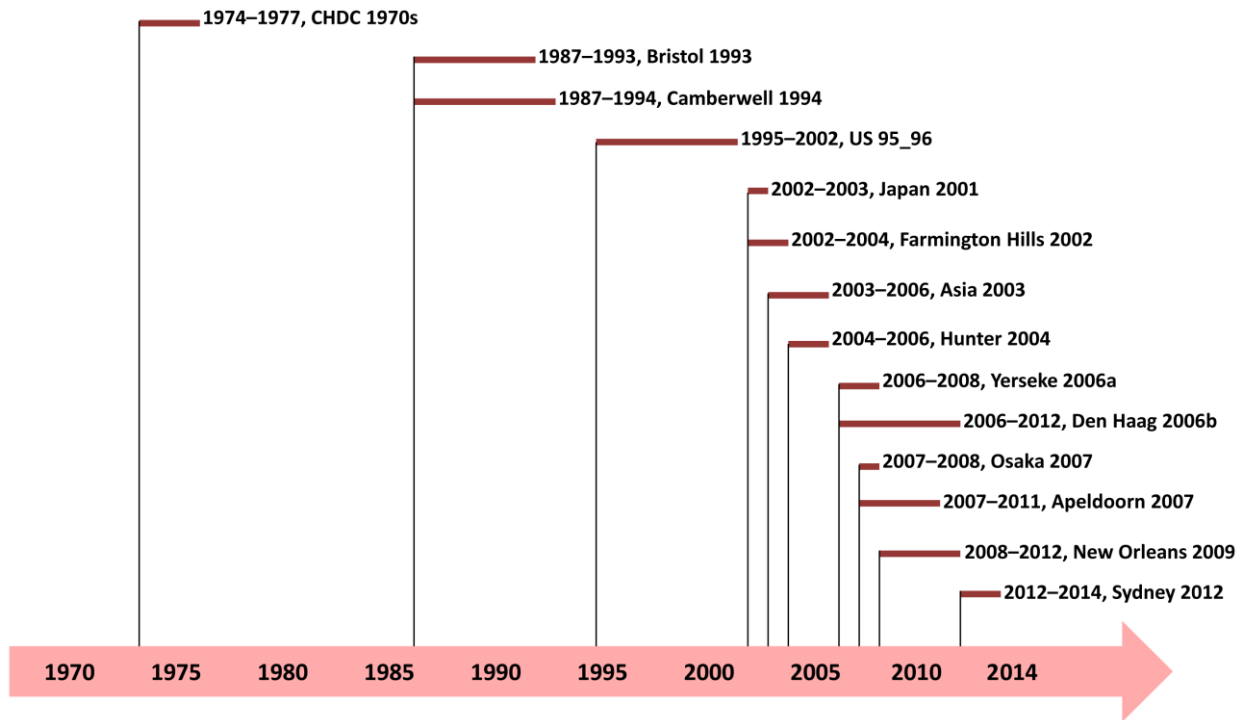

**Figure S2** Sequence alignment of oyster-related NoVs

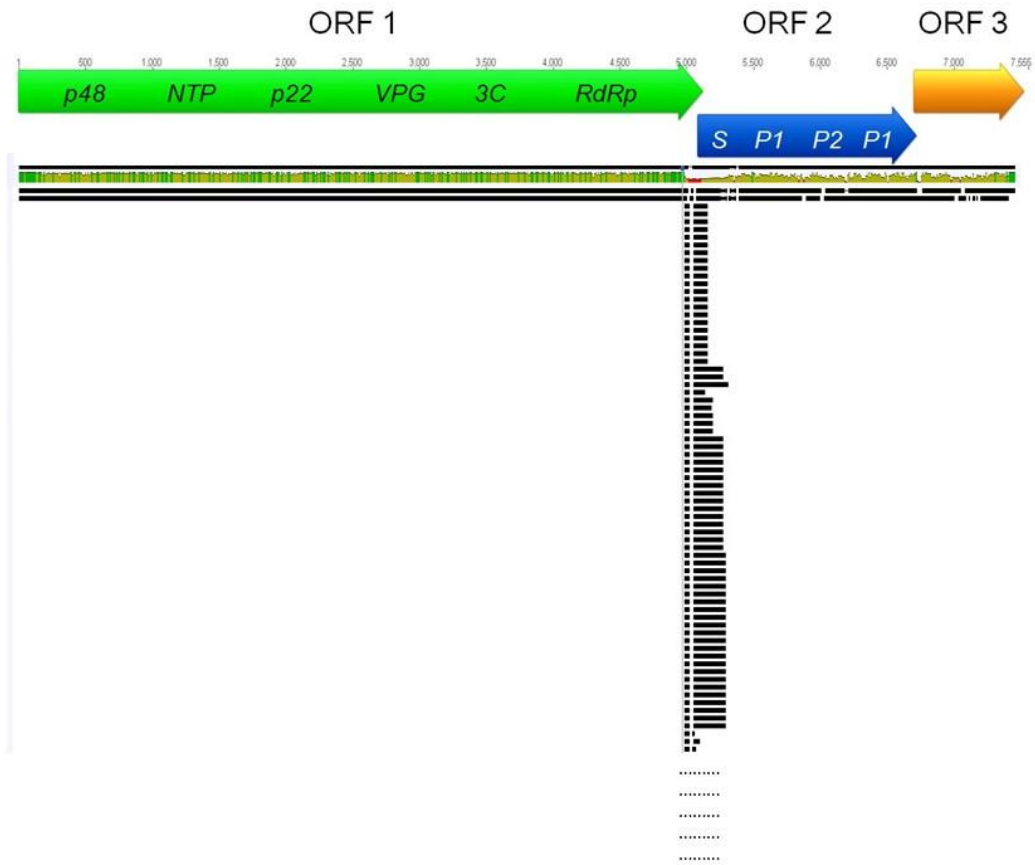

**Figure S3** Yearly distribution of oyster-related GII.4 NoV variants during 2002-2014.

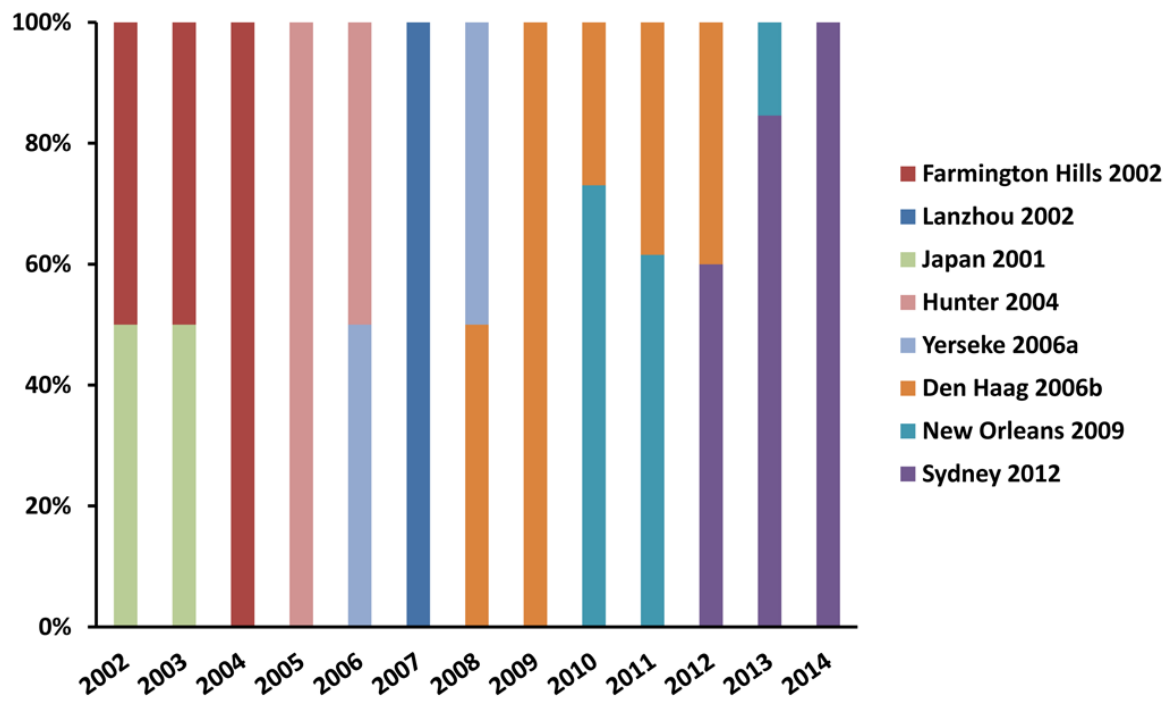

**Figure S4** Phylogenetic analysis of oyster-related five GIV NoVs

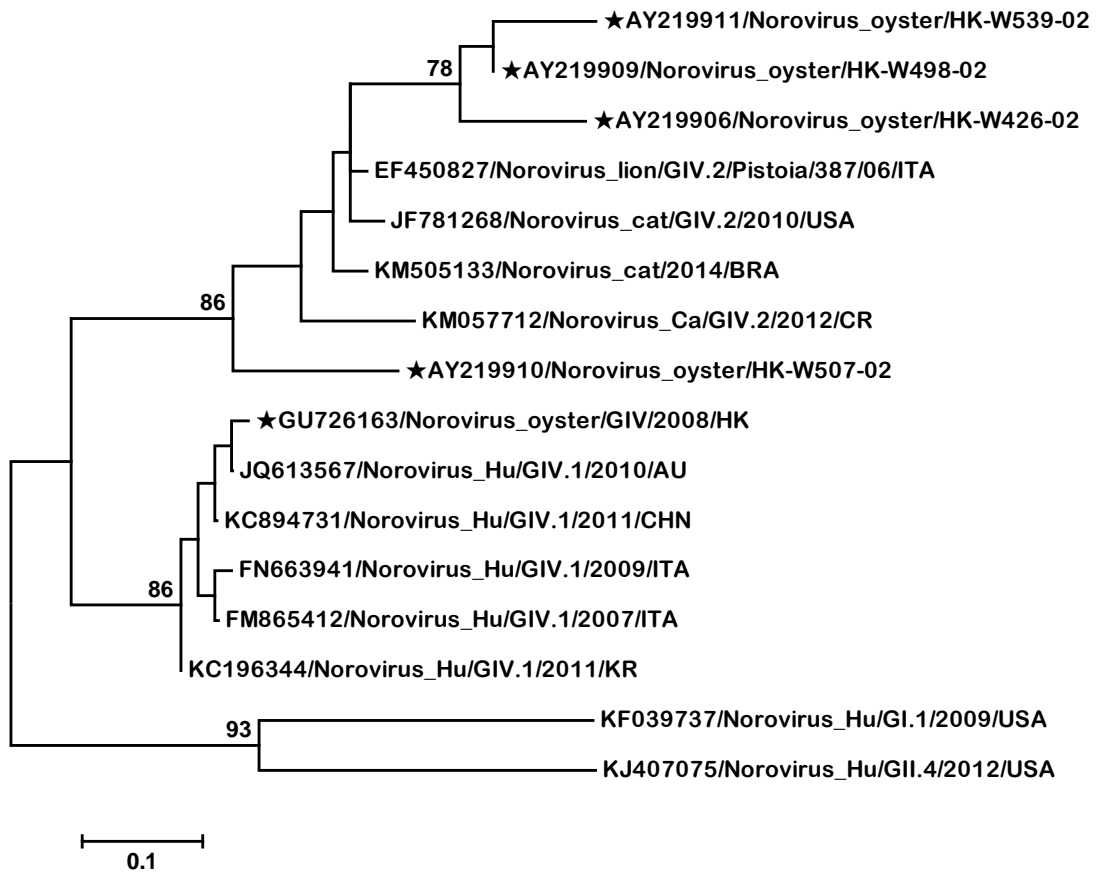

**Table S1** Information of 665 oyster-related NoV sequences

| No. | Accession                | Sample | Source | Country | Isolate time | Submit time | Reference | Length /nt | ORF1 genotype | ORF2 genotype |
|-----|--------------------------|--------|--------|---------|--------------|-------------|-----------|------------|---------------|---------------|
| 1   | 01ME0310_32426_seq_1     | Human  | Oyster | France  | 2010         | 2010        | Noronet   | 253        | GII.P4        |               |
| 2   | 01ME0310_32426_seq_2     | Human  | Oyster | France  | 2010         | 2010        | Noronet   | 302        |               | GII.4         |
| 3   | 12L23012288_39162_seq_1  | Human  | Oyster | Denmark | 2012         | 2013        | Noronet   | 309        | GII.Pg        |               |
| 4   | 12L23012288_39162_seq_2  | Human  | Oyster | Denmark | 2012         | 2013        | Noronet   | 435        | GII.Pg        | GII.1         |
| 5   | 12L23015847_39163_seq_1  | Human  | Oyster | Denmark | 2012         | 2013        | Noronet   | 329        |               | GI.2          |
| 6   | 12L23029955_39166_seq_1  | Human  | Oyster | Denmark | 2012         | 2013        | Noronet   | 326        | GII.Pg        |               |
| 7   | 12L23029955_39166_seq_2  | Human  | Oyster | Denmark | 2012         | 2013        | Noronet   | 320        |               | GII.1         |
| 8   | 12L240029617_39185_seq_1 | Human  | Oyster | Denmark | 2012         | 2013        | Noronet   | 237        |               | GII.7         |
| 9   | 12L240029672_39186_seq_1 | Human  | Oyster | Denmark | 2012         | 2013        | Noronet   | 157        | GI.P4         |               |
| 10  | 16IS0410_32458_seq_1     | Human  | Oyster | France  | 2010         | 2010        | Noronet   | 302        |               | GII.13        |
| 11  | 2002_ISS_02_10723_seq_1  | Human  | Oyster | Italy   | 2002         | 2003        | Noronet   | 288        | GII.P8        |               |
| 12  | 2010-07_35032_seq_1      | Human  | Oyster | Denmark | 2010         | 2011        | Noronet   | 285        | GII.P2        |               |
| 13  | 2010-07_35032_seq_2      | Human  | Oyster | Denmark | 2010         | 2011        | Noronet   | 285        | GI.P7         |               |
| 14  | 2010-07_35032_seq_3      | Human  | Oyster | Denmark | 2010         | 2011        | Noronet   | 299        |               | GII.12        |
| 15  | 2010-07_35032_seq_4      | Human  | Oyster | Denmark | 2010         | 2011        | Noronet   | 299        |               | GII.2         |
| 16  | 25BE1210_34113_seq_1     | Human  | Oyster | France  | 2010         | 2011        | Noronet   | 291        |               | GI.4          |
| 17  | 27CY0310_32452_seq_1     | Human  | Oyster | France  | 2010         | 2010        | Noronet   | 288        | GII.Pg        |               |
| 18  | 27CY0310_32452_seq_2     | Human  | Oyster | France  | 2010         | 2010        | Noronet   | 301        |               | GII.12        |
| 19  | 29CH1212_41006_seq_2     | Human  | Oyster | France  | 2012         | 2013        | Noronet   | 302        |               | GII.4         |
| 20  | 29CH1212_41006_seq_3     | Human  | Oyster | France  | 2012         | 2013        | Noronet   | 302        |               | GII.4         |
| 21  | 34GI0412_37096_seq_1     | Human  | Oyster | France  | 2012         | 2012        | Noronet   | 139        |               | GII.1         |
| 22  | 34MO0210_32410_seq_1     | Human  | Oyster | France  | 2010         | 2010        | Noronet   | 285        | GII.P4        |               |
| 23  | 34MO0210_32410_seq_2     | Human  | Oyster | France  | 2010         | 2010        | Noronet   | 302        |               | GII.4         |
| 24  | 34MO0210_32410_seq_3     | Human  | Oyster | France  | 2010         | 2010        | Noronet   | 300        |               | GII.13        |
| 25  | 34MO0210_32410_seq_4     | Human  | Oyster | France  | 2010         | 2010        | Noronet   | 291        |               | GI.1          |
| 26  | 34SE0310_32424_seq_1     | Human  | Oyster | France  | 2010         | 2010        | Noronet   | 286        | GII.P4        |               |
| 27  | 34SE0310_32424_seq_2     | Human  | Oyster | France  | 2010         | 2010        | Noronet   | 302        |               | GII.4         |
| 28  | 34VE0313_41184_seq_1     | Human  | Oyster | France  | 2013         | 2013        | Noronet   | 290        |               | GI.6          |
| 29  | 34VE0313_41184_seq_2     | Human  | Oyster | France  | 2013         | 2013        | Noronet   | 302        |               | GII.14        |
| 30  | 34VE0313_41184_seq_3     | Human  | Oyster | France  | 2013         | 2013        | Noronet   | 285        | GI.Pb         |               |
| 31  | 34VE0313_41184_seq_4     | Human  | Oyster | France  | 2013         | 2013        | Noronet   | 302        |               | GII.4         |
| 32  | 35CA0310_32444_seq_1     | Human  | Oyster | France  | 2010         | 2010        | Noronet   | 245        |               | GII.4         |
| 33  | 37663_26133_seq_1        | Human  | Oyster | Finland | 2002         | 2002        | Noronet   | 60         | GI.PNA        |               |
| 34  | 37TO0413-2_41217_seq_1   | Human  | Oyster | France  | 2013         | 2013        | Noronet   | 285        | GII.Pe        |               |
| 35  | 37TO0413-2_41217_seq_2   | Human  | Oyster | France  | 2013         | 2013        | Noronet   | 302        |               | GII.4         |
| 36  | 38VO0310_32460_seq_1     | Human  | Oyster | France  | 2010         | 2010        | Noronet   | 285        | GII.Pg        |               |
| 37  | 38VO0310_32460_seq_2     | Human  | Oyster | France  | 2010         | 2010        | Noronet   | 302        |               | GII.12        |
| 38  | 38VO0310_32460_seq_3     | Human  | Oyster | France  | 2010         | 2010        | Noronet   | 287        |               | GI.3          |
| 39  | 40LI0111_34151_seq_1     | Human  | Oyster | France  | 2011         | 2011        | Noronet   | 306        | GI.Pb         |               |

|    |                        |       |        |        |      |      |         |     |        |        |
|----|------------------------|-------|--------|--------|------|------|---------|-----|--------|--------|
| 40 | 40LI0111_34151_seq_2   | Human | Oyster | France | 2011 | 2011 | Noronet | 302 |        | GII.13 |
| 41 | 41CH0310_32446_seq_1   | Human | Oyster | France | 2010 | 2010 | Noronet | 291 |        | GI.3   |
| 42 | 44AN0313_41177_seq_2   | Human | Oyster | France | 2013 | 2013 | Noronet | 147 |        | GII.7  |
| 43 | 44BA0110_32370_seq_1   | Human | Oyster | France | 2010 | 2010 | Noronet | 288 | GII.P4 |        |
| 44 | 44BA0110_32370_seq_2   | Human | Oyster | France | 2010 | 2010 | Noronet | 288 | GII.Pg |        |
| 45 | 44BA0110_32370_seq_3   | Human | Oyster | France | 2010 | 2010 | Noronet | 285 | GL.Pb  |        |
| 46 | 44BA0110_32370_seq_4   | Human | Oyster | France | 2010 | 2010 | Noronet | 290 |        | GI.1   |
| 47 | 44CH1213_42131_seq_1   | Human | Oyster | France | 2014 | 2014 | Noronet | 285 | GII.Pg |        |
| 48 | 44CH1213_42131_seq_2   | Human | Oyster | France | 2014 | 2014 | Noronet | 302 |        | GII.2  |
| 49 | 44MA1112_40928_seq_1   | Human | Oyster | France | 2012 | 2013 | Noronet | 285 | GII.Pe |        |
| 50 | 44MA1112_40928_seq_2   | Human | Oyster | France | 2012 | 2013 | Noronet | 302 |        | GII.4  |
| 51 | 44MA1112_40928_seq_3   | Human | Oyster | France | 2012 | 2013 | Noronet | 287 |        | GI.6   |
| 52 | 44MA1112_40928_seq_4   | Human | Oyster | France | 2012 | 2013 | Noronet | 290 |        | GI.6   |
| 53 | 44NA0214-2_42170_seq_1 | Human | Oyster | France | 2014 | 2014 | Noronet | 285 | GII.Pe |        |
| 54 | 44NA0214-2_42170_seq_2 | Human | Oyster | France | 2014 | 2014 | Noronet | 282 |        | GII.6  |
| 55 | 44NA0214-2_42170_seq_3 | Human | Oyster | France | 2014 | 2014 | Noronet | 302 |        | GII.4  |
| 56 | 44OR0111_34244_seq_1   | Human | Oyster | France | 2011 | 2011 | Noronet | 285 | GII.P4 |        |
| 57 | 44OR0111_34244_seq_2   | Human | Oyster | France | 2011 | 2011 | Noronet | 297 |        | GII.4  |
| 58 | 44OR0111_34244_seq_3   | Human | Oyster | France | 2011 | 2011 | Noronet | 285 | GII.Pg |        |
| 59 | 44OR0111_34244_seq_4   | Human | Oyster | France | 2011 | 2011 | Noronet | 302 |        | GII.12 |
| 60 | 44RE0213_41143_seq_1   | Human | Oyster | France | 2013 | 2013 | Noronet | 286 | GII.P4 |        |
| 61 | 44RE0213_41143_seq_2   | Human | Oyster | France | 2013 | 2013 | Noronet | 302 |        | GII.4  |
| 62 | 45JE1211_35114_seq_1   | Human | Oyster | France | 2011 | 2011 | Noronet | 302 |        | GII.4  |
| 63 | 49AN0213_41147_seq_1   | Human | Oyster | France | 2013 | 2013 | Noronet | 174 |        | GII.4  |
| 64 | 50LE1212_40990_seq_1   | Human | Oyster | France | 2013 | 2013 | Noronet | 285 | GII.Pe |        |
| 65 | 50LE1212_40990_seq_2   | Human | Oyster | France | 2013 | 2013 | Noronet | 333 |        | GI.3   |
| 66 | 50LE1212_40990_seq_3   | Human | Oyster | France | 2013 | 2013 | Noronet | 278 |        | GII.4  |
| 67 | 56BI1111_35106_seq_1   | Human | Oyster | France | 2011 | 2011 | Noronet | 285 | GII.P4 |        |
| 68 | 56GU1212_40992_seq_3   | Human | Oyster | France | 2013 | 2013 | Noronet | 302 |        | GII.4  |
| 69 | 56GU1212_40992_seq_4   | Human | Oyster | France | 2013 | 2013 | Noronet | 290 |        | GI.6   |
| 70 | 67DA0310_32442_seq_1   | Human | Oyster | France | 2010 | 2010 | Noronet | 287 | GII.Pg |        |
| 71 | 67DA0310_32442_seq_2   | Human | Oyster | France | 2010 | 2010 | Noronet | 300 |        | GII.1  |
| 72 | 67DA0310_32442_seq_3   | Human | Oyster | France | 2010 | 2010 | Noronet | 273 |        | GI.4   |
| 73 | 67DA0310_32442_seq_4   | Human | Oyster | France | 2010 | 2010 | Noronet | 302 |        | GII.13 |
| 74 | 72CH0210_32403_seq_1   | Human | Oyster | France | 2010 | 2010 | Noronet | 287 | GII.P4 |        |
| 75 | 72CH0210_32403_seq_2   | Human | Oyster | France | 2010 | 2010 | Noronet | 301 |        | GII.4  |
| 76 | 72CH0210_32403_seq_3   | Human | Oyster | France | 2010 | 2010 | Noronet | 300 |        | GII.13 |
| 77 | 72SE0310_32435_seq_1   | Human | Oyster | France | 2010 | 2010 | Noronet | 288 | GL.P7  |        |
| 78 | 72SE0310_32435_seq_2   | Human | Oyster | France | 2010 | 2010 | Noronet | 291 |        | GI.7   |
| 79 | 72SE0310_32435_seq_3   | Human | Oyster | France | 2010 | 2010 | Noronet | 291 |        | GI.3   |
| 80 | 72SE0310_32435_seq_4   | Human | Oyster | France | 2010 | 2010 | Noronet | 301 |        | GII.21 |
| 81 | 79MA0314_43487_seq_1   | Human | Oyster | France | 2014 | 2014 | Noronet | 302 |        | GII.4  |
| 82 | 79MA0314_43487_seq_2   | Human | Oyster | France | 2014 | 2014 | Noronet | 302 |        | GII.4  |

|     |                      |        |        |        |      |      |         |     |        |        |
|-----|----------------------|--------|--------|--------|------|------|---------|-----|--------|--------|
| 83  | 79MA0314_43487_seq_3 | Human  | Oyster | France | 2014 | 2014 | Noronet | 302 |        | GII.6  |
| 84  | 79MA0314_43487_seq_4 | Human  | Oyster | France | 2014 | 2014 | Noronet | 300 |        | GII.NA |
| 85  | 79NI0214_42173_seq_1 | Human  | Oyster | France | 2014 | 2014 | Noronet | 286 | GLPb   |        |
| 86  | 79NI0214_42173_seq_2 | Human  | Oyster | France | 2014 | 2014 | Noronet | 290 |        | GI.4   |
| 87  | 79NI0214_42173_seq_3 | Human  | Oyster | France | 2014 | 2014 | Noronet | 302 |        | GII.4  |
| 88  | 79NI0214_42173_seq_4 | Human  | Oyster | France | 2014 | 2014 | Noronet | 278 |        | GI.6   |
| 89  | 85Av0114_42104_seq_1 | Human  | Oyster | France | 2014 | 2014 | Noronet | 147 |        | GII.6  |
| 90  | 85PO0112_37010_seq_1 | Human  | Oyster | France | 2012 | 2012 | Noronet | 307 | GII.Pg |        |
| 91  | 85PO0112_37010_seq_2 | Human  | Oyster | France | 2012 | 2012 | Noronet | 302 |        | GII.1  |
| 92  | 85PO0112_37010_seq_3 | Human  | Oyster | France | 2012 | 2012 | Noronet | 152 |        | GII.7  |
| 93  | 85RO0113_41125_seq_1 | Human  | Oyster | France | 2013 | 2013 | Noronet | 227 | GII.Pe |        |
| 94  | 85RO0113_41125_seq_2 | Human  | Oyster | France | 2013 | 2013 | Noronet | 302 |        | GII.4  |
| 95  | 87LI0110_32366_seq_1 | Human  | Oyster | France | 2010 | 2010 | Noronet | 288 | GII.Pg |        |
| 96  | 87LI0110_32366_seq_2 | Human  | Oyster | France | 2010 | 2010 | Noronet | 262 |        | GII.1  |
| 97  | 91DR1211_36967_seq_1 | Human  | Oyster | France | 2011 | 2012 | Noronet | 291 |        | GI.4   |
| 98  | 91DR1211_36967_seq_2 | Human  | Oyster | France | 2011 | 2012 | Noronet | 173 |        | GII.7  |
| 99  | 93DE0113_40994_seq_1 | Human  | Oyster | France | 2013 | 2013 | Noronet | 285 | GII.Pe |        |
| 100 | 93DE0113_40994_seq_3 | Human  | Oyster | France | 2013 | 2013 | Noronet | 250 |        | GII.4  |
| 101 | 93DE0113_40994_seq_4 | Human  | Oyster | France | 2013 | 2013 | Noronet | 303 |        | GII.4  |
| 102 | AB009390             | Oyster | Oyster | Japan  | 1994 | 2006 | 2       | 292 | GII.P3 |        |
| 103 | AB097905             | Oyster | Oyster | Japan  | 2001 | 2002 | 5       | 255 |        | GII.8  |
| 104 | AB097906             | Oyster | Oyster | Japan  | 2001 | 2002 | 5       | 339 |        | GII.1  |
| 105 | AB097907             | Oyster | Oyster | Japan  | 2001 | 2002 | 5       | 277 |        | GII.8  |
| 106 | AB097908             | Oyster | Oyster | Japan  | 2001 | 2002 | 5       | 270 |        | GII.6  |
| 107 | AB097909             | Oyster | Oyster | Japan  | 2001 | 2002 | 5       | 272 |        | GII.6  |
| 108 | AB097910             | Oyster | Oyster | Japan  | 2001 | 2002 | 5       | 330 |        | GII.13 |
| 109 | AB097911             | Oyster | Oyster | Japan  | 2001 | 2002 | 5       | 323 |        | GI.3   |
| 110 | AB097912             | Oyster | Oyster | Japan  | 2002 | 2002 | 5       | 302 |        | GII.3  |
| 111 | AB097913             | Oyster | Oyster | Japan  | 2001 | 2002 | 5       | 280 |        | GI.4   |
| 112 | AB097914             | Oyster | Oyster | Japan  | 2001 | 2002 | 5       | 272 |        | GII.6  |
| 113 | AB097915             | Oyster | Oyster | Japan  | 2001 | 2002 | 5       | 267 |        | GII.8  |
| 114 | AB097916             | Oyster | Oyster | Japan  | 2001 | 2002 | 5       | 339 |        | GII.7  |
| 115 | AB097917             | Oyster | Oyster | Japan  | 2002 | 2002 | 5       | 261 |        | GII.7  |
| 116 | AB097918             | Oyster | Oyster | Japan  | 2002 | 2002 | 5       | 324 |        | GII.3  |
| 117 | AB097919             | Oyster | Oyster | Japan  | 2002 | 2002 | 5       | 324 |        | GII.6  |
| 118 | AB097920             | Oyster | Oyster | Japan  | 2002 | 2002 | 5       | 302 |        | GI.7   |
| 119 | AB097921             | Oyster | Oyster | Japan  | 2002 | 2002 | 5       | 316 |        | GII.5  |
| 120 | AB111894             | Oyster | Oyster | Japan  | 2002 | 2002 | 5       | 302 |        | GII.6  |
| 121 | AB111895             | Oyster | Oyster | Japan  | 2002 | 2002 | 5       | 291 |        | GI.4   |
| 122 | AB111896             | Oyster | Oyster | Japan  | 2002 | 2002 | 5       | 302 |        | GII.5  |
| 123 | AB186057             | Human  | oyster | Japan  | 2002 | 2004 | 16      | 290 |        | GI.7   |
| 124 | AB186058             | Human  | oyster | Japan  | 2002 | 2004 | 16      | 278 |        | GII.3  |
| 125 | AB186059             | Human  | oyster | Japan  | 2002 | 2004 | 16      | 278 |        | GII.3  |



|     |          |       |        |       |      |      |    |     |  |        |
|-----|----------|-------|--------|-------|------|------|----|-----|--|--------|
| 126 | AB186060 | Human | oyster | Japan | 2002 | 2004 | 16 | 278 |  | GII.5  |
| 127 | AB186061 | Human | oyster | Japan | 2002 | 2004 | 16 | 278 |  | GII.12 |
| 128 | AB186062 | Human | oyster | Japan | 2002 | 2004 | 16 | 278 |  | GII.12 |
| 129 | AB186064 | Human | oyster | Japan | 2002 | 2004 | 16 | 278 |  | GII.4  |
| 130 | AB186066 | Human | oyster | Japan | 2002 | 2004 | 16 | 278 |  | GII.3  |
| 131 | AB186067 | Human | oyster | Japan | 2003 | 2004 | 16 | 278 |  | GII.5  |
| 132 | AB186068 | Human | oyster | Japan | 2003 | 2004 | 16 | 290 |  | GI.7   |
| 133 | AB186069 | Human | oyster | Japan | 2003 | 2004 | 16 | 278 |  | GII.5  |
| 134 | AB186070 | Human | oyster | Japan | 2003 | 2004 | 16 | 290 |  | GI.7   |
| 135 | AB186071 | Human | oyster | Japan | 2003 | 2004 | 16 | 278 |  | GII.3  |
| 136 | AB186072 | Human | oyster | Japan | 2003 | 2004 | 16 | 278 |  | GII.3  |
| 137 | AB186073 | Human | oyster | Japan | 2003 | 2004 | 16 | 290 |  | GI.7   |
| 138 | AB186074 | Human | oyster | Japan | 2003 | 2004 | 16 | 278 |  | GII.6  |
| 139 | AB186075 | Human | oyster | Japan | 2003 | 2004 | 16 | 290 |  | GI.4   |
| 140 | AB186076 | Human | oyster | Japan | 2003 | 2004 | 16 | 278 |  | GII.3  |
| 141 | AB186077 | Human | oyster | Japan | 2003 | 2004 | 16 | 278 |  | GII.1  |
| 142 | AB186078 | Human | oyster | Japan | 2003 | 2004 | 16 | 290 |  | GI.7   |
| 143 | AB186079 | Human | oyster | Japan | 2003 | 2004 | 16 | 278 |  | GII.3  |
| 144 | AB186080 | Human | oyster | Japan | 2003 | 2004 | 16 | 290 |  | GI.2   |
| 145 | AB186081 | Human | oyster | Japan | 2003 | 2004 | 16 | 278 |  | GII.3  |
| 146 | AB186082 | Human | oyster | Japan | 2003 | 2004 | 16 | 278 |  | GII.5  |
| 147 | AB186083 | Human | oyster | Japan | 2003 | 2004 | 16 | 290 |  | GI.4   |
| 148 | AB186084 | Human | oyster | Japan | 2003 | 2004 | 16 | 278 |  | GII.5  |
| 149 | AB186085 | Human | oyster | Japan | 2003 | 2004 | 16 | 278 |  | GII.5  |
| 150 | AB186086 | Human | oyster | Japan | 2003 | 2004 | 16 | 278 |  | GII.5  |
| 151 | AB186087 | Human | oyster | Japan | 2003 | 2004 | 16 | 290 |  | GI.4   |
| 152 | AB186088 | Human | oyster | Japan | 2003 | 2004 | 16 | 278 |  | GII.3  |
| 153 | AB186089 | Human | oyster | Japan | 2003 | 2004 | 16 | 290 |  | GI.6   |
| 154 | AB186090 | Human | oyster | Japan | 2003 | 2004 | 16 | 278 |  | GII.5  |
| 155 | AB186091 | Human | oyster | Japan | 2003 | 2004 | 16 | 290 |  | GI.7   |
| 156 | AB186092 | Human | oyster | Japan | 2003 | 2004 | 16 | 278 |  | GII.16 |
| 157 | AB186093 | Human | oyster | Japan | 2003 | 2004 | 16 | 278 |  | GII.16 |
| 158 | AB186094 | Human | oyster | Japan | 2003 | 2004 | 16 | 278 |  | GII.3  |
| 159 | AB186095 | Human | oyster | Japan | 2003 | 2004 | 16 | 290 |  | GI.5   |
| 160 | AB186096 | Human | oyster | Japan | 2003 | 2004 | 16 | 290 |  | GI.4   |
| 161 | AB186097 | Human | oyster | Japan | 2003 | 2004 | 16 | 278 |  | GII.8  |
| 162 | AB186098 | Human | oyster | Japan | 2003 | 2004 | 16 | 278 |  | GII.13 |
| 163 | AB186099 | Human | oyster | Japan | 2003 | 2004 | 16 | 278 |  | GII.8  |
| 164 | AB186100 | Human | oyster | Japan | 2003 | 2004 | 16 | 278 |  | GII.8  |
| 165 | AB186101 | Human | oyster | Japan | 2003 | 2004 | 16 | 290 |  | GI.1   |
| 166 | AB186102 | Human | oyster | Japan | 2003 | 2004 | 16 | 278 |  | GII.8  |
| 167 | AB186103 | Human | oyster | Japan | 2003 | 2004 | 16 | 278 |  | GII.6  |
| 168 | AB186104 | Human | oyster | Japan | 2003 | 2004 | 16 | 278 |  | GII.16 |

|     |          |        |        |       |      |      |    |     |  |        |
|-----|----------|--------|--------|-------|------|------|----|-----|--|--------|
| 169 | AB186105 | Human  | oyster | Japan | 2003 | 2004 | 16 | 278 |  | GII.3  |
| 170 | AB186106 | Human  | oyster | Japan | 2003 | 2004 | 16 | 278 |  | GII.5  |
| 171 | AB186107 | Human  | oyster | Japan | 2003 | 2004 | 16 | 278 |  | GII.6  |
| 172 | AB262091 | Oyster | Oyster | Japan | 2002 | 2006 | 6  | 279 |  | GII.5  |
| 173 | AB262092 | Oyster | Oyster | Japan | 2002 | 2006 | 6  | 279 |  | GII.4  |
| 174 | AB262093 | Oyster | Oyster | Japan | 2002 | 2006 | 6  | 290 |  | GI.NA  |
| 175 | AB262094 | Oyster | Oyster | Japan | 2002 | 2006 | 6  | 281 |  | GII.NA |
| 176 | AB262095 | Oyster | Oyster | Japan | 2002 | 2006 | 6  | 281 |  | GII.NA |
| 177 | AB262096 | Oyster | Oyster | Japan | 2002 | 2006 | 6  | 275 |  | GII.6  |
| 178 | AB262097 | Oyster | Oyster | Japan | 2002 | 2006 | 6  | 278 |  | GII.4  |
| 179 | AB262098 | Oyster | Oyster | Japan | 2002 | 2006 | 6  | 278 |  | GII.13 |
| 180 | AB262099 | Oyster | Oyster | Japan | 2003 | 2006 | 6  | 278 |  | GII.3  |
| 181 | AB262100 | Oyster | Oyster | Japan | 2003 | 2006 | 6  | 244 |  | GII.3  |
| 182 | AB262101 | Oyster | Oyster | Japan | 2003 | 2006 | 6  | 244 |  | GII.3  |
| 183 | AB262102 | Oyster | Oyster | Japan | 2003 | 2006 | 6  | 244 |  | GII.3  |
| 184 | AB262103 | Oyster | Oyster | Japan | 2003 | 2006 | 6  | 278 |  | GII.3  |
| 185 | AB262104 | Oyster | Oyster | Japan | 2003 | 2006 | 6  | 278 |  | GII.3  |
| 186 | AB262105 | Oyster | Oyster | Japan | 2003 | 2006 | 6  | 278 |  | GII.6  |
| 187 | AB262106 | Oyster | Oyster | Japan | 2003 | 2006 | 6  | 290 |  | GI.2   |
| 188 | AB262107 | Oyster | Oyster | Japan | 2003 | 2006 | 6  | 290 |  | GI.2   |
| 189 | AB262108 | Oyster | Oyster | Japan | 2003 | 2006 | 6  | 290 |  | GI.NA  |
| 190 | AB262109 | Oyster | Oyster | Japan | 2003 | 2006 | 6  | 278 |  | GII.4  |
| 191 | AB262110 | Oyster | Oyster | Japan | 2003 | 2006 | 6  | 298 |  | GI.4   |
| 192 | AB262111 | Oyster | Oyster | Japan | 2003 | 2006 | 6  | 298 |  | GI.4   |
| 193 | AB262112 | Oyster | Oyster | Japan | 2003 | 2006 | 6  | 298 |  | GI.4   |
| 194 | AB262113 | Oyster | Oyster | Japan | 2003 | 2006 | 6  | 290 |  | GI.4   |
| 195 | AB262114 | Oyster | Oyster | Japan | 2003 | 2006 | 6  | 278 |  | GII.8  |
| 196 | AB262115 | Oyster | Oyster | Japan | 2003 | 2006 | 6  | 279 |  | GII.5  |
| 197 | AB262116 | Oyster | Oyster | Japan | 2003 | 2006 | 6  | 278 |  | GII.8  |
| 198 | AB262117 | Oyster | Oyster | Japan | 2003 | 2006 | 6  | 310 |  | GI.3   |
| 199 | AB262118 | Oyster | Oyster | Japan | 2003 | 2006 | 6  | 313 |  | GI.3   |
| 200 | AB262119 | Oyster | Oyster | Japan | 2003 | 2006 | 6  | 283 |  | GII.2  |
| 201 | AB262120 | Oyster | Oyster | Japan | 2003 | 2006 | 6  | 283 |  | GII.2  |
| 202 | AB262121 | Oyster | Oyster | Japan | 2003 | 2006 | 6  | 283 |  | GII.2  |
| 203 | AB262122 | Oyster | Oyster | Japan | 2003 | 2006 | 6  | 278 |  | GII.5  |
| 204 | AB262123 | Oyster | Oyster | Japan | 2003 | 2006 | 6  | 283 |  | GII.2  |
| 205 | AB262124 | Oyster | Oyster | Japan | 2003 | 2006 | 6  | 283 |  | GII.2  |
| 206 | AB262125 | Oyster | Oyster | Japan | 2003 | 2006 | 6  | 278 |  | GII.5  |
| 207 | AB262126 | Oyster | Oyster | Japan | 2003 | 2006 | 6  | 283 |  | GII.2  |
| 208 | AB262127 | Oyster | Oyster | Japan | 2003 | 2006 | 6  | 278 |  | GII.5  |
| 209 | AB262128 | Oyster | Oyster | Japan | 2003 | 2006 | 6  | 283 |  | GII.2  |
| 210 | AB262129 | Oyster | Oyster | Japan | 2003 | 2006 | 6  | 283 |  | GII.2  |
| 211 | AB262130 | Oyster | Oyster | Japan | 2003 | 2006 | 6  | 278 |  | GII.5  |

|     |          |        |        |       |      |      |             |     |  |       |
|-----|----------|--------|--------|-------|------|------|-------------|-----|--|-------|
| 212 | AB262131 | Oyster | Oyster | Japan | 2003 | 2006 | 6           | 278 |  | GII.5 |
| 213 | AB262132 | Oyster | Oyster | Japan | 2003 | 2006 | 6           | 283 |  | GII.2 |
| 214 | AB262133 | Oyster | Oyster | Japan | 2003 | 2006 | 6           | 278 |  | GII.5 |
| 215 | AB262134 | Oyster | Oyster | Japan | 2003 | 2006 | 6           | 277 |  | GII.5 |
| 216 | AB262135 | Oyster | Oyster | Japan | 2003 | 2006 | 6           | 283 |  | GII.2 |
| 217 | AB262136 | Oyster | Oyster | Japan | 2003 | 2006 | 6           | 278 |  | GII.3 |
| 218 | AB262137 | Oyster | Oyster | Japan | 2003 | 2006 | 6           | 278 |  | GII.3 |
| 219 | AB262138 | Oyster | Oyster | Japan | 2003 | 2006 | 6           | 278 |  | GII.3 |
| 220 | AB262139 | Oyster | Oyster | Japan | 2003 | 2006 | 6           | 278 |  | GII.3 |
| 221 | AB262140 | Oyster | Oyster | Japan | 2003 | 2006 | 6           | 287 |  | GII.3 |
| 222 | AB262141 | Oyster | Oyster | Japan | 2003 | 2006 | 6           | 290 |  | GI.5  |
| 223 | AB262142 | Oyster | Oyster | Japan | 2003 | 2006 | 6           | 290 |  | GI.NA |
| 224 | AB262143 | Oyster | Oyster | Japan | 2004 | 2006 | 6           | 290 |  | GI.NA |
| 225 | AB262144 | Oyster | Oyster | Japan | 2004 | 2006 | 6           | 278 |  | GII.5 |
| 226 | AB262145 | Oyster | Oyster | Japan | 2004 | 2006 | 6           | 278 |  | GII.5 |
| 227 | AB262146 | Oyster | Oyster | Japan | 2004 | 2006 | 6           | 283 |  | GII.2 |
| 228 | AB262147 | Oyster | Oyster | Japan | 2004 | 2006 | 6           | 278 |  | GII.5 |
| 229 | AB262148 | Oyster | Oyster | Japan | 2004 | 2006 | 6           | 283 |  | GII.2 |
| 230 | AB262149 | Oyster | Oyster | Japan | 2004 | 2006 | 6           | 283 |  | GII.2 |
| 231 | AB262150 | Oyster | Oyster | Japan | 2004 | 2006 | 6           | 290 |  | GI.1  |
| 232 | AB262151 | Oyster | Oyster | Japan | 2004 | 2006 | 6           | 290 |  | GI.NA |
| 233 | AB262152 | Oyster | Oyster | Japan | 2004 | 2006 | 6           | 278 |  | GII.3 |
| 234 | AB262153 | Oyster | Oyster | Japan | 2004 | 2006 | 6           | 290 |  | GI.NA |
| 235 | AB262154 | Oyster | Oyster | Japan | 2004 | 2006 | 6           | 290 |  | GI.1  |
| 236 | AB262155 | Oyster | Oyster | Japan | 2004 | 2006 | 6           | 290 |  | GI.NA |
| 237 | AB262156 | Oyster | Oyster | Japan | 2005 | 2006 | 6           | 290 |  | GI.1  |
| 238 | AB262157 | Oyster | Oyster | Japan | 2005 | 2006 | 6           | 290 |  | GI.1  |
| 239 | AB262158 | Oyster | Oyster | Japan | 2005 | 2006 | 6           | 290 |  | GI.NA |
| 240 | AB262159 | Oyster | Oyster | Japan | 2005 | 2006 | 6           | 278 |  | GII.4 |
| 241 | AB262160 | Oyster | Oyster | Japan | 2005 | 2006 | 6           | 278 |  | GII.3 |
| 242 | AB262161 | Oyster | Oyster | Japan | 2005 | 2006 | 6           | 290 |  | GI.4  |
| 243 | AB262162 | Oyster | Oyster | Japan | 2005 | 2006 | 6           | 290 |  | GI.4  |
| 244 | AB262163 | Oyster | Oyster | Japan | 2005 | 2006 | 6           | 290 |  | GI.1  |
| 245 | AB262164 | Oyster | Oyster | Japan | 2005 | 2006 | 6           | 290 |  | GI.3  |
| 246 | AB262165 | Oyster | Oyster | Japan | 2005 | 2006 | 6           | 290 |  | GI.3  |
| 247 | AB264147 | Oyster | Oyster | Japan | 2005 | 2006 | Unpublished | 198 |  | GI.NA |
| 248 | AB264148 | Oyster | Oyster | Japan | 2005 | 2006 | Unpublished | 198 |  | GI.NA |
| 249 | AB264149 | Oyster | Oyster | Japan | 2005 | 2006 | Unpublished | 199 |  | GI.3  |
| 250 | AB264150 | Oyster | Oyster | Japan | 2005 | 2006 | Unpublished | 199 |  | GI.4  |
| 251 | AB264151 | Oyster | Oyster | Japan | 2005 | 2006 | Unpublished | 207 |  | GI.1  |
| 252 | AB264152 | Oyster | Oyster | Japan | 2005 | 2006 | Unpublished | 199 |  | GI.3  |
| 253 | AB264153 | Oyster | Oyster | Japan | 2005 | 2006 | Unpublished | 208 |  | GI.4  |
| 254 | AB264154 | Oyster | Oyster | Japan | 2005 | 2006 | Unpublished | 208 |  | GI.4  |

|     |          |        |        |       |      |      |             |     |  |       |
|-----|----------|--------|--------|-------|------|------|-------------|-----|--|-------|
| 255 | AB264155 | Oyster | Oyster | Japan | 2005 | 2006 | Unpublished | 198 |  | GI.1  |
| 256 | AB264156 | Oyster | Oyster | Japan | 2005 | 2006 | Unpublished | 198 |  | GI.NA |
| 257 | AB264157 | Oyster | Oyster | Japan | 2005 | 2006 | Unpublished | 208 |  | GI.4  |
| 258 | AB264158 | Oyster | Oyster | Japan | 2005 | 2006 | Unpublished | 198 |  | GI.1  |
| 259 | AB264159 | Oyster | Oyster | Japan | 2005 | 2006 | Unpublished | 191 |  | GI.4  |
| 260 | AB264160 | Oyster | Oyster | Japan | 2005 | 2006 | Unpublished | 210 |  | GI.4  |
| 261 | AB264161 | Oyster | Oyster | Japan | 2005 | 2006 | Unpublished | 198 |  | GI.3  |
| 262 | AB264162 | Oyster | Oyster | Japan | 2005 | 2006 | Unpublished | 198 |  | GI.3  |
| 263 | AB264163 | Oyster | Oyster | Japan | 2005 | 2006 | Unpublished | 197 |  | GI.NA |
| 264 | AB264164 | Oyster | Oyster | Japan | 2005 | 2006 | Unpublished | 198 |  | GI.3  |
| 265 | AB264165 | Oyster | Oyster | Japan | 2005 | 2006 | Unpublished | 208 |  | GI.4  |
| 266 | AB264166 | Oyster | Oyster | Japan | 2006 | 2006 | Unpublished | 207 |  | GI.4  |
| 267 | AB264167 | Oyster | Oyster | Japan | 2006 | 2006 | Unpublished | 208 |  | GI.4  |
| 268 | AB264168 | Oyster | Oyster | Japan | 2006 | 2006 | Unpublished | 198 |  | GI.3  |
| 269 | AB264169 | Oyster | Oyster | Japan | 2006 | 2006 | Unpublished | 205 |  | GI.4  |
| 270 | AB264170 | Oyster | Oyster | Japan | 2006 | 2006 | Unpublished | 206 |  | GI.4  |
| 271 | AB287444 | Oyster | Oyster | Japan | 2005 | 2006 | Unpublished | 143 |  | GII.3 |
| 272 | AB287445 | Oyster | Oyster | Japan | 2006 | 2006 | Unpublished | 162 |  | GII.3 |
| 273 | AB287446 | Oyster | Oyster | Japan | 2005 | 2006 | Unpublished | 170 |  | GII.4 |
| 274 | AB287447 | Oyster | Oyster | Japan | 2005 | 2006 | Unpublished | 170 |  | GII.4 |
| 275 | AB287448 | Oyster | Oyster | Japan | 2005 | 2006 | Unpublished | 169 |  | GII.4 |
| 276 | AB287449 | Oyster | Oyster | Japan | 2006 | 2006 | Unpublished | 149 |  | GII.6 |
| 277 | AB287450 | Oyster | Oyster | Japan | 2006 | 2006 | Unpublished | 167 |  | GII.6 |
| 278 | AB287451 | Oyster | Oyster | Japan | 2006 | 2006 | Unpublished | 169 |  | GII.4 |
| 279 | AB287452 | Oyster | Oyster | Japan | 2006 | 2006 | Unpublished | 170 |  | GII.4 |
| 280 | AB287453 | Oyster | Oyster | Japan | 2006 | 2006 | Unpublished | 168 |  | GII.3 |
| 281 | AB287454 | Oyster | Oyster | Japan | 2006 | 2006 | Unpublished | 169 |  | GII.3 |
| 282 | AB287455 | Oyster | Oyster | Japan | 2006 | 2006 | Unpublished | 170 |  | GII.4 |
| 283 | AB287456 | Oyster | Oyster | Japan | 2005 | 2006 | Unpublished | 167 |  | GII.8 |
| 284 | AB287457 | Oyster | Oyster | Japan | 2005 | 2006 | Unpublished | 169 |  | GII.6 |
| 285 | AB287458 | Oyster | Oyster | Japan | 2005 | 2006 | Unpublished | 169 |  | GII.3 |
| 286 | AB287459 | Oyster | Oyster | Japan | 2005 | 2006 | Unpublished | 169 |  | GII.4 |
| 287 | AB287460 | Oyster | Oyster | Japan | 2005 | 2006 | Unpublished | 169 |  | GII.4 |
| 288 | AB287461 | Oyster | Oyster | Japan | 2005 | 2006 | Unpublished | 170 |  | GII.4 |
| 289 | AB287462 | Oyster | Oyster | Japan | 2005 | 2006 | Unpublished | 169 |  | GII.3 |
| 290 | AB287463 | Oyster | Oyster | Japan | 2005 | 2006 | Unpublished | 170 |  | GII.4 |
| 291 | AB287464 | Oyster | Oyster | Japan | 2005 | 2006 | Unpublished | 170 |  | GII.4 |
| 292 | AB287465 | Oyster | Oyster | Japan | 2006 | 2006 | Unpublished | 169 |  | GII.4 |
| 293 | AB287466 | Oyster | Oyster | Japan | 2006 | 2006 | Unpublished | 169 |  | GII.4 |
| 294 | AB287467 | Oyster | Oyster | Japan | 2006 | 2006 | Unpublished | 169 |  | GII.4 |
| 295 | AB287468 | Oyster | Oyster | Japan | 2006 | 2006 | Unpublished | 166 |  | GII.6 |
| 296 | AB287469 | Oyster | Oyster | Japan | 2006 | 2006 | Unpublished | 154 |  | GII.4 |
| 297 | AB287470 | Oyster | Oyster | Japan | 2006 | 2006 | Unpublished | 169 |  | GII.3 |

|     |                       |        |        |           |      |      |             |     |         |        |
|-----|-----------------------|--------|--------|-----------|------|------|-------------|-----|---------|--------|
| 298 | AB287471              | Oyster | Oyster | Japan     | 2006 | 2006 | Unpublished | 170 |         | GII.6  |
| 299 | AB287472              | Oyster | Oyster | Japan     | 2005 | 2006 | Unpublished | 169 |         | GII.4  |
| 300 | AB287473              | Oyster | Oyster | Japan     | 2005 | 2006 | Unpublished | 169 |         | GII.4  |
| 301 | AB287474              | Oyster | Oyster | Japan     | 2005 | 2006 | Unpublished | 168 |         | GII.6  |
| 302 | AB287475              | Oyster | Oyster | Japan     | 2005 | 2006 | Unpublished | 170 |         | GII.4  |
| 303 | AB287476              | Oyster | Oyster | Japan     | 2005 | 2006 | Unpublished | 169 |         | GII.4  |
| 304 | AB287477              | Oyster | Oyster | Japan     | 2005 | 2006 | Unpublished | 150 |         | GII.5  |
| 305 | AB287478              | Oyster | Oyster | Japan     | 2005 | 2006 | Unpublished | 172 |         | GII.4  |
| 306 | AB287479              | Oyster | Oyster | Japan     | 2005 | 2006 | Unpublished | 169 |         | GII.4  |
| 307 | AB287480              | Oyster | Oyster | Japan     | 2005 | 2006 | Unpublished | 167 |         | GII.4  |
| 308 | AB287481              | Oyster | Oyster | Japan     | 2005 | 2006 | Unpublished | 168 |         | GII.6  |
| 309 | AB287482              | Oyster | Oyster | Japan     | 2005 | 2006 | Unpublished | 171 |         | GII.NA |
| 310 | AB287483              | Oyster | Oyster | Japan     | 2005 | 2006 | Unpublished | 170 |         | GII.6  |
| 311 | AB287484              | Oyster | Oyster | Japan     | 2005 | 2006 | Unpublished | 169 |         | GII.6  |
| 312 | AB287485              | Oyster | Oyster | Japan     | 2005 | 2006 | Unpublished | 169 |         | GII.6  |
| 313 | AB287486              | Oyster | Oyster | Japan     | 2005 | 2006 | Unpublished | 169 |         | GII.6  |
| 314 | AB287487              | Oyster | Oyster | Japan     | 2005 | 2006 | Unpublished | 168 |         | GII.4  |
| 315 | AB287488              | Oyster | Oyster | Japan     | 2005 | 2006 | Unpublished | 167 |         | GII.NA |
| 316 | AB287489              | Oyster | Oyster | Japan     | 2005 | 2006 | Unpublished | 169 |         | GII.4  |
| 317 | AB287490              | Oyster | Oyster | Japan     | 2005 | 2006 | Unpublished | 170 |         | GII.4  |
| 318 | AB287491              | Oyster | Oyster | Japan     | 2005 | 2006 | Unpublished | 182 |         | GII.4  |
| 319 | AB287492              | Oyster | Oyster | Japan     | 2005 | 2006 | Unpublished | 169 |         | GII.6  |
| 320 | AB287493              | Oyster | Oyster | Japan     | 2006 | 2006 | Unpublished | 169 |         | GII.4  |
| 321 | AB287494              | Oyster | Oyster | Japan     | 2006 | 2006 | Unpublished | 169 |         | GII.4  |
| 322 | AB287495              | Oyster | Oyster | Japan     | 2006 | 2006 | Unpublished | 170 |         | GII.4  |
| 323 | AB287496              | Oyster | Oyster | Japan     | 2006 | 2006 | Unpublished | 168 |         | GII.3  |
| 324 | AB287497              | Oyster | Oyster | Japan     | 2006 | 2006 | Unpublished | 169 |         | GII.4  |
| 325 | AB287498              | Oyster | Oyster | Japan     | 2006 | 2006 | Unpublished | 171 |         | GII.4  |
| 326 | AB287499              | Oyster | Oyster | Japan     | 2006 | 2006 | Unpublished | 170 |         | GII.3  |
| 327 | AB287500              | Oyster | Oyster | Japan     | 2006 | 2006 | Unpublished | 168 |         | GII.5  |
| 328 | AB287501              | Oyster | Oyster | Japan     | 2006 | 2006 | Unpublished | 175 |         | GII.3  |
| 329 | AB287502              | Oyster | Oyster | Japan     | 2006 | 2006 | Unpublished | 170 |         | GII.4  |
| 330 | AB287503              | Oyster | Oyster | Japan     | 2006 | 2006 | Unpublished | 168 |         | GII.6  |
| 331 | AB287504              | Oyster | Oyster | Japan     | 2006 | 2006 | Unpublished | 168 |         | GII.3  |
| 332 | AB287505              | Oyster | Oyster | Japan     | 2006 | 2006 | Unpublished | 173 |         | GII.4  |
| 333 | AB287506              | Oyster | Oyster | Japan     | 2006 | 2006 | Unpublished | 169 |         | GII.3  |
| 334 | AB428374              | Human  | Oyster | Japan     | 2008 | 2008 | Unpublished | 291 |         | GI.3   |
| 335 | ASPB0111_39451_seq_1  | Human  | Oyster | Spain     | 2011 | 2013 | Noronet     | 279 |         | GII.4  |
| 336 | ASPB0111b_39452_seq_1 | Human  | Oyster | Spain     | 2011 | 2013 | Noronet     | 259 |         | GII.7  |
| 337 | ASPB0111c_42080_seq_1 | Human  | Oyster | Spain     | 2011 | 2013 | Noronet     | 314 |         | GII.4  |
| 338 | AY219905              | Oyster | Oyster | Hong Kong | 2002 | 2003 | 7           | 76  | GII.PNA |        |
| 339 | AY219906              | Oyster | Oyster | Hong Kong | 2002 | 2003 | 7           | 76  | GIV     |        |
| 340 | AY219907              | Oyster | Oyster | Hong Kong | 2002 | 2003 | 7           | 76  | GII.PNA |        |

|     |                       |        |                        |             |      |      |             |      |         |        |
|-----|-----------------------|--------|------------------------|-------------|------|------|-------------|------|---------|--------|
| 341 | AY219908              | Oyster | Oyster                 | Hong Kong   | 2002 | 2003 | 7           | 76   | GII.NA  |        |
| 342 | AY219909              | Oyster | Oyster                 | Hong Kong   | 2002 | 2003 | 7           | 76   | GIV     |        |
| 343 | AY219910              | Oyster | Oyster                 | Hong Kong   | 2002 | 2003 | 7           | 76   | GIV     |        |
| 344 | AY219911              | Oyster | Oyster                 | Hong Kong   | 2002 | 2003 | 7           | 76   | GIV     |        |
| 345 | AY603019              | Oyster | Oyster                 | Netherlands | 2000 | 2004 | Unpublished | 204  |         | GI.4   |
| 346 | AY603020              | Oyster | Oyster                 | Netherlands | 2001 | 2004 | Unpublished | 204  |         | GI.1   |
| 347 | AY603021              | Oyster | Oyster                 | Netherlands | 2002 | 2004 | Unpublished | 204  |         | GI.6   |
| 348 | AY603022              | Oyster | Oyster                 | France      | 2000 | 2004 | Unpublished | 195  | GII.P6  |        |
| 349 | AY662678              | Oyster | Oyster                 | UK          | 2004 | 2004 | Unpublished | 78   | GI.PNA  |        |
| 350 | AY995577              | Oyster | Oyster                 | Netherlands | 2004 | 2005 | Unpublished | 150  | GI.P4   |        |
| 351 | DK_2013_1_42144_seq_1 | Human  | oysters or raspberries | Denmark     | 2013 | 2014 | Noronet     | 299  | GII.P4  |        |
| 352 | DK_2013_1_42144_seq_2 | Human  | oysters or raspberries | Denmark     | 2013 | 2014 | Noronet     | 1534 |         | GII.4  |
| 353 | DK_2013_2_42145_seq_1 | Human  | Oyster                 | Denmark     | 2013 | 2014 | Noronet     | 320  | GI.Pb   |        |
| 354 | DK_2013_2_42145_seq_2 | Human  | Oyster                 | Denmark     | 2013 | 2014 | Noronet     | 195  |         | GII.4  |
| 355 | DK_2013_3_42146_seq_1 | Human  | Oyster                 | Denmark     | 2013 | 2014 | Noronet     | 290  | GI.P3   |        |
| 356 | DK_2013_3_42146_seq_2 | Human  | Oyster                 | Denmark     | 2013 | 2014 | Noronet     | 343  |         | GI.3   |
| 357 | DQ000652              | Oyster | Oyster                 | Netherlands | 2004 | 2005 | Unpublished | 204  |         | GI.2   |
| 358 | DQ026456              | Oyster | Oyster                 | China       | 2004 | 2005 | Unpublished | 327  | GII.P4  |        |
| 359 | DQ379713              | Human  | Oyster                 | Australia   | 1983 | 2006 | 8           | 3620 | GII.PNA | GII.3  |
| 360 | DQ379714              | Human  | Oyster                 | Australia   | 1983 | 2006 | 8           | 3564 | GII.Pg  | GII.13 |
| 361 | DQ379715              | Human  | Oyster                 | Australia   | 1983 | 2006 | 8           | 3814 | GII.P7  | GII.9  |
| 362 | DQ440544              | Oyster | Oyster                 | Netherlands | 2006 | 2006 | Unpublished | 285  | GI.P2   |        |
| 363 | DQ440545              | Oyster | Oyster                 | Netherlands | 2006 | 2006 | Unpublished | 285  | GII.P2  |        |
| 364 | DQ452538              | Human  | oyster                 | Canada      | 2003 | 2006 | 9           | 172  | GII.P4  |        |
| 365 | DQ452539              | Human  | oyster                 | Canada      | 2003 | 2006 | 9           | 172  | GI.P2   |        |
| 366 | DQ452540              | Human  | oyster                 | Canada      | 2003 | 2006 | 9           | 172  | GII.P7  |        |
| 367 | DQ452541              | Human  | oyster                 | Canada      | 2003 | 2006 | 9           | 172  | GII.P5  |        |
| 368 | DQ452542              | Human  | oyster                 | Canada      | 2004 | 2006 | 9           | 172  | GII.P4  |        |
| 369 | DQ452543              | Human  | oyster                 | Canada      | 2004 | 2006 | 9           | 172  | GII.P7  |        |
| 370 | DQ452544              | Human  | oyster                 | Canada      | 2004 | 2006 | 9           | 172  | GII.P21 |        |
| 371 | DQ452545              | Human  | oyster                 | Canada      | 2004 | 2006 | 9           | 172  | GII.P12 |        |
| 372 | DQ452546              | Human  | oyster                 | Canada      | 2004 | 2006 | 9           | 172  | GI.P2   |        |
| 373 | DQ452547              | Human  | oyster                 | Canada      | 2004 | 2006 | 9           | 172  | GI.P1   |        |
| 374 | DQ452548              | Oyster | Oyster                 | Canada      | 2004 | 2006 | 9           | 172  | GI.P2   |        |
| 375 | DQ452549              | Oyster | Oyster                 | Canada      | 2004 | 2006 | 9           | 172  | GI.P2   |        |
| 376 | DQ452550              | Oyster | Oyster                 | Canada      | 2004 | 2006 | 9           | 172  | GI.P2   |        |
| 377 | DQ452551              | Oyster | Oyster                 | Canada      | 2004 | 2006 | 9           | 172  | GI.P2   |        |
| 378 | DQ452552              | Oyster | Oyster                 | Canada      | 2004 | 2006 | 9           | 172  | GI.P2   |        |
| 379 | DQ452553              | Oyster | Oyster                 | Canada      | 2004 | 2006 | 9           | 172  | GI.P2   |        |
| 380 | DQ452554              | Oyster | Oyster                 | Canada      | 2004 | 2006 | 9           | 172  | GI.P2   |        |
| 381 | DQ452555              | Oyster | Oyster                 | Canada      | 2004 | 2006 | 9           | 172  | GI.P2   |        |

|     |                      |        |        |             |      |      |             |      |         |      |
|-----|----------------------|--------|--------|-------------|------|------|-------------|------|---------|------|
| 382 | DQ452556             | Oyster | Oyster | Canada      | 2004 | 2006 | 9           | 172  | GLP2    |      |
| 383 | DQ452557             | Oyster | Oyster | Canada      | 2004 | 2006 | 9           | 172  | GII.P12 |      |
| 384 | DQ452558             | Oyster | Oyster | Canada      | 2004 | 2006 | 9           | 172  | GLP2    |      |
| 385 | DQ452559             | Oyster | Oyster | Canada      | 2004 | 2006 | 9           | 172  | GLP2    |      |
| 386 | DQ452560             | Oyster | Oyster | Canada      | 2004 | 2006 | 9           | 172  | GLP2    |      |
| 387 | DQ452561             | Oyster | Oyster | Canada      | 2004 | 2006 | 9           | 172  | GLP2    |      |
| 388 | DQ452562             | Oyster | Oyster | Canada      | 2004 | 2006 | 9           | 172  | GLP2    |      |
| 389 | DQ452563             | Oyster | Oyster | Canada      | 2004 | 2006 | 9           | 172  | GLP2    |      |
| 390 | DQ452564             | Oyster | Oyster | Canada      | 2004 | 2006 | 9           | 172  | GII.P12 |      |
| 391 | DQ452565             | Oyster | Oyster | Canada      | 2004 | 2006 | 9           | 172  | GII.P7  |      |
| 392 | DQ452566             | Oyster | Oyster | Canada      | 2004 | 2006 | 9           | 172  | GLP2    |      |
| 393 | DQ452567             | Oyster | Oyster | Canada      | 2004 | 2006 | 9           | 172  | GLP2    |      |
| 394 | DQ452568             | Oyster | Oyster | Canada      | 2004 | 2006 | 9           | 172  | GLP2    |      |
| 395 | EF495254             | Oyster | Oyster | Germany     | 2006 | 2007 | Unpublished | 271  | GII.P4  |      |
| 396 | EF495255             | Oyster | Oyster | Germany     | 2006 | 2007 | Unpublished | 278  | GII.P21 |      |
| 397 | EU131188             | Oyster | Oyster | France      | 2006 | 2007 | Unpublished | 195  | GII.P4  |      |
| 398 | EU131190             | Oyster | Oyster | France      | 2006 | 2007 | Unpublished | 195  | GII.P21 |      |
| 399 | EU131191             | Oyster | Oyster | France      | 2006 | 2007 | Unpublished | 397  | GII.P7  |      |
| 400 | EU131192             | Oyster | Oyster | France      | 2006 | 2007 | Unpublished | 397  | GII.P21 |      |
| 401 | EU131193             | Oyster | Oyster | France      | 2006 | 2007 | Unpublished | 195  | GII.P4  |      |
| 402 | EU131194             | Oyster | Oyster | France      | 2006 | 2007 | Unpublished | 150  | GLP4    |      |
| 403 | EU543169             | Oyster | Oyster | France      | 2008 | 2008 | Unpublished | 204  |         | GI.4 |
| 404 | EU543170             | Oyster | Oyster | France      | 2008 | 2008 | Unpublished | 195  | GII.P21 |      |
| 405 | EU543171             | Oyster | Oyster | France      | 2008 | 2008 | Unpublished | 195  | GII.P21 |      |
| 406 | EU543172             | Oyster | Oyster | France      | 2008 | 2008 | Unpublished | 150  | GLP4    |      |
| 407 | EU543173             | Oyster | Oyster | France      | 2008 | 2008 | Unpublished | 204  |         | GI.2 |
| 408 | EU718209             | Oyster | Oyster | China       | 2007 | 2008 | 10          | 327  | GII.P12 |      |
| 409 | EU718210             | Oyster | Oyster | China       | 2007 | 2008 | 10          | 327  | GII.P12 |      |
| 410 | EU760380             | Oyster | Oyster | China       | 2008 | 2008 | Unpublished | 327  | GII.P12 |      |
| 411 | EU910582             | Oyster | Oyster | USA         | 2007 | 2008 | 11          | 182  | GII.P4  |      |
| 412 | FIN_1069_32612_seq_1 | Human  | Oyster | Finland     | 2010 | 2010 | Noronet     | 317  | GLPb    |      |
| 413 | FJ384779             | Oyster | Oyster | Sweden      | 2007 | 2008 | 12          | 285  | GLP1    |      |
| 414 | FJ384780             | Oyster | Oyster | Sweden      | 2007 | 2008 | 12          | 285  | GLP1    |      |
| 415 | FJ384781             | Oyster | Oyster | Sweden      | 2007 | 2008 | 12          | 285  | GLP1    |      |
| 416 | FJ384782             | Oyster | Oyster | Sweden      | 2007 | 2008 | 12          | 285  | GII.P3  |      |
| 417 | FJ384783             | Human  | Oyster | Sweden      | 2007 | 2008 | 12          | 3083 | GLP1    | GI.1 |
| 418 | FJ796686             | Human  | Oyster | USA         | 2008 | 2009 | 11          | 77   | GII.P4  |      |
| 419 | FJ796687             | Oyster | Oyster | USA         | 2007 | 2009 | 11          | 77   | GII.P4  |      |
| 420 | FJ796688             | Oyster | Oyster | South Korea | 2006 | 2009 | 11          | 111  | GLP6    |      |
| 421 | FJ796689             | Oyster | Oyster | South Korea | 2006 | 2009 | 11          | 71   | GLP11   |      |
| 422 | GQ200582             | Oyster | Oyster | Canada      | 2008 | 2009 | Unpublished | 172  | GII.P3  |      |
| 423 | GQ200583             | Oyster | Oyster | Canada      | 2009 | 2009 | Unpublished | 172  | GII.P4  |      |
| 424 | GQ200584             | Oyster | Oyster | Canada      | 2009 | 2009 | Unpublished | 172  | GII.P4  |      |

|     |          |        |        |           |      |      |             |     |         |        |
|-----|----------|--------|--------|-----------|------|------|-------------|-----|---------|--------|
| 425 | GQ401120 | Oyster | Oyster | Taiwan    | 2008 | 2009 | Unpublished | 330 |         | GI.4   |
| 426 | GQ401121 | Oyster | Oyster | Taiwan    | 2008 | 2009 | Unpublished | 330 |         | GI.4   |
| 427 | GQ401122 | Oyster | Oyster | Taiwan    | 2008 | 2009 | Unpublished | 330 |         | GI.3   |
| 428 | GQ401123 | Oyster | Oyster | Taiwan    | 2008 | 2009 | Unpublished | 330 |         | GI.4   |
| 429 | GQ401124 | Oyster | Oyster | Taiwan    | 2009 | 2009 | Unpublished | 330 |         | GI.4   |
| 430 | GQ401125 | Oyster | Oyster | Taiwan    | 2009 | 2009 | Unpublished | 330 |         | GI.4   |
| 431 | GQ401126 | Oyster | Oyster | Taiwan    | 2009 | 2009 | Unpublished | 330 |         | GI.4   |
| 432 | GQ401127 | Oyster | Oyster | Taiwan    | 2009 | 2009 | Unpublished | 330 |         | GI.4   |
| 433 | GQ401128 | Oyster | Oyster | Taiwan    | 2009 | 2009 | Unpublished | 330 |         | GI.4   |
| 434 | GQ401129 | Oyster | Oyster | Taiwan    | 2009 | 2009 | Unpublished | 330 |         | GI.4   |
| 435 | GQ401130 | Oyster | Oyster | Taiwan    | 2009 | 2009 | Unpublished | 330 |         | GI.3   |
| 436 | GU320061 | Oyster | Oyster | Thailand  | 2005 | 2009 | Unpublished | 214 |         | GI.2   |
| 437 | GU320062 | Oyster | Oyster | Thailand  | 2005 | 2009 | Unpublished | 260 |         | GI.2   |
| 438 | GU726146 | Oyster | Oyster | Hong Kong | 2008 | 2010 | Unpublished | 66  | GI.P8   |        |
| 439 | GU726147 | Oyster | Oyster | Hong Kong | 2008 | 2010 | Unpublished | 66  | GI.P3   |        |
| 440 | GU726148 | Oyster | Oyster | Hong Kong | 2008 | 2010 | Unpublished | 66  | GI.P1   |        |
| 441 | GU726149 | Oyster | Oyster | Hong Kong | 2007 | 2010 | Unpublished | 66  | GI.P4   |        |
| 442 | GU726150 | Oyster | Oyster | Hong Kong | 2008 | 2010 | Unpublished | 66  | GI.P2   |        |
| 443 | GU726151 | Oyster | Oyster | Hong Kong | 2008 | 2010 | Unpublished | 66  | GI.P7   |        |
| 444 | GU726152 | Oyster | Oyster | Hong Kong | 2008 | 2010 | Unpublished | 73  | GII.P4  |        |
| 445 | GU726153 | Oyster | Oyster | Hong Kong | 2009 | 2010 | Unpublished | 73  | GII.P4  |        |
| 446 | GU726154 | Oyster | Oyster | Hong Kong | 2008 | 2010 | Unpublished | 73  | GII.P4  |        |
| 447 | GU726155 | Oyster | Oyster | Hong Kong | 2005 | 2010 | Unpublished | 73  | GII.P4  |        |
| 448 | GU726156 | Oyster | Oyster | Hong Kong | 2005 | 2010 | Unpublished | 73  | GII.P4  |        |
| 449 | GU726157 | Oyster | Oyster | Hong Kong | 2007 | 2010 | Unpublished | 73  | GII.P4  |        |
| 450 | GU726158 | Oyster | Oyster | Hong Kong | 2008 | 2010 | Unpublished | 73  | GII.P5  |        |
| 451 | GU726159 | Oyster | Oyster | Hong Kong | 2004 | 2010 | Unpublished | 73  | GII.P3  |        |
| 452 | GU726160 | Oyster | Oyster | Hong Kong | 2008 | 2010 | Unpublished | 73  | GII.P2  |        |
| 453 | GU726161 | Oyster | Oyster | Hong Kong | 2008 | 2010 | Unpublished | 73  | GII.Pb  |        |
| 454 | GU726162 | Oyster | Oyster | Hong Kong | 2004 | 2010 | Unpublished | 73  | GII.Pb  |        |
| 455 | GU726163 | Oyster | Oyster | Hong Kong | 2008 | 2010 | Unpublished | 73  | GIV     |        |
| 456 | GU726164 | Oyster | Oyster | Hong Kong | 2006 | 2010 | Unpublished | 73  | GII.P18 |        |
| 457 | GU726165 | Oyster | Oyster | Hong Kong | 2008 | 2010 | Unpublished | 73  | GII.P18 |        |
| 458 | GU726166 | Oyster | Oyster | Hong Kong | 2008 | 2010 | Unpublished | 73  | GII.PNA |        |
| 459 | GU726167 | Oyster | Oyster | Hong Kong | 2006 | 2010 | Unpublished | 73  | GII.P8  |        |
| 460 | GU726168 | Oyster | Oyster | Hong Kong | 2005 | 2010 | Unpublished | 73  | GII.P6  |        |
| 461 | HM560933 | Oyster | Oyster | Taiwan    | 2010 | 2010 | Unpublished | 344 |         | GII.4  |
| 462 | HM560934 | Oyster | Oyster | Taiwan    | 2010 | 2010 | Unpublished | 344 |         | GII.18 |
| 463 | HM560935 | Oyster | Oyster | Taiwan    | 2010 | 2010 | Unpublished | 344 |         | GII.4  |
| 464 | HM560936 | Oyster | Oyster | Taiwan    | 2010 | 2010 | Unpublished | 344 |         | GII.4  |
| 465 | HM560937 | Oyster | Oyster | Taiwan    | 2010 | 2010 | Unpublished | 344 |         | GII.18 |
| 466 | HM560938 | Oyster | Oyster | Taiwan    | 2010 | 2010 | Unpublished | 344 |         | GII.4  |
| 467 | HM560939 | Oyster | Oyster | Taiwan    | 2010 | 2010 | Unpublished | 344 |         | GII.18 |



|     |          |        |        |         |      |      |             |     |  |        |
|-----|----------|--------|--------|---------|------|------|-------------|-----|--|--------|
| 468 | HM560940 | Oyster | Oyster | Taiwan  | 2010 | 2010 | Unpublished | 342 |  | GII.14 |
| 469 | HM560941 | Oyster | Oyster | Taiwan  | 2010 | 2010 | Unpublished | 344 |  | GII.3  |
| 470 | HM560942 | Oyster | Oyster | Taiwan  | 2010 | 2010 | Unpublished | 344 |  | GII.3  |
| 471 | HM560943 | Oyster | Oyster | Taiwan  | 2010 | 2010 | Unpublished | 344 |  | GII.3  |
| 472 | HM560944 | Oyster | Oyster | Taiwan  | 2010 | 2010 | Unpublished | 344 |  | GII.12 |
| 473 | HM560945 | Oyster | Oyster | Taiwan  | 2010 | 2010 | Unpublished | 344 |  | GII.4  |
| 474 | HM560946 | Oyster | Oyster | Taiwan  | 2010 | 2010 | Unpublished | 344 |  | GII.21 |
| 475 | HM560947 | Oyster | Oyster | Taiwan  | 2010 | 2010 | Unpublished | 344 |  | GII.6  |
| 476 | HM560948 | Oyster | Oyster | Taiwan  | 2010 | 2010 | Unpublished | 344 |  | GII.4  |
| 477 | HM560949 | Oyster | Oyster | Taiwan  | 2010 | 2010 | Unpublished | 344 |  | GII.5  |
| 478 | HM560950 | Oyster | Oyster | Taiwan  | 2010 | 2010 | Unpublished | 344 |  | GII.6  |
| 479 | JN896704 | Oyster | Oyster | Canada  | 2010 | 2011 | 15          | 222 |  | GII.20 |
| 480 | JN896705 | Oyster | Oyster | Canada  | 2010 | 2011 | 15          | 264 |  | GI.4   |
| 481 | JQ280400 | Human  | oyster | Ireland | 2010 | 2013 | 3           | 277 |  | GII.4  |
| 482 | JQ280401 | Human  | oyster | Ireland | 2010 | 2013 | 3           | 277 |  | GII.4  |
| 483 | JQ280402 | Human  | oyster | Ireland | 2010 | 2013 | 3           | 277 |  | GII.4  |
| 484 | JQ280403 | Human  | oyster | Ireland | 2010 | 2013 | 3           | 277 |  | GII.13 |
| 485 | JQ280404 | Human  | oyster | Ireland | 2010 | 2013 | 3           | 277 |  | GII.4  |
| 486 | JQ280405 | Human  | oyster | Ireland | 2010 | 2013 | 3           | 277 |  | GII.4  |
| 487 | JQ280406 | Human  | oyster | Ireland | 2010 | 2013 | 3           | 277 |  | GII.4  |
| 488 | JQ280407 | Human  | oyster | Ireland | 2010 | 2013 | 3           | 289 |  | GI.6   |
| 489 | JQ362531 | Oyster | Oyster | Ireland | 2010 | 2011 | 3           | 302 |  | GII.12 |
| 490 | JQ362532 | Oyster | Oyster | Ireland | 2010 | 2011 | 3           | 302 |  | GII.12 |
| 491 | JQ362533 | Oyster | Oyster | Ireland | 2010 | 2011 | 3           | 302 |  | GII.4  |
| 492 | JQ362534 | Oyster | Oyster | Ireland | 2010 | 2011 | 3           | 302 |  | GII.12 |
| 493 | JQ362535 | Oyster | Oyster | Ireland | 2010 | 2011 | 3           | 302 |  | GII.12 |
| 494 | JQ362536 | Oyster | Oyster | Ireland | 2010 | 2011 | 3           | 302 |  | GII.6  |
| 495 | JQ362537 | Oyster | Oyster | Ireland | 2010 | 2011 | 3           | 302 |  | GII.4  |
| 496 | JQ362538 | Oyster | Oyster | Ireland | 2010 | 2011 | 3           | 302 |  | GII.4  |
| 497 | JQ362539 | Oyster | Oyster | Ireland | 2010 | 2011 | 3           | 302 |  | GII.4  |
| 498 | JQ362540 | Oyster | Oyster | Ireland | 2010 | 2011 | 3           | 302 |  | GII.12 |
| 499 | JQ362541 | Oyster | Oyster | Ireland | 2010 | 2011 | 3           | 302 |  | GII.4  |
| 500 | JQ362542 | Oyster | Oyster | Ireland | 2010 | 2011 | 3           | 302 |  | GII.12 |
| 501 | JQ362543 | Oyster | Oyster | Ireland | 2010 | 2011 | 3           | 302 |  | GII.3  |
| 502 | JQ362544 | Oyster | Oyster | Ireland | 2010 | 2011 | 3           | 302 |  | GII.4  |
| 503 | JQ362545 | Oyster | Oyster | Ireland | 2010 | 2011 | 3           | 302 |  | GII.3  |
| 504 | JQ362546 | Oyster | Oyster | Ireland | 2010 | 2011 | 3           | 302 |  | GII.4  |
| 505 | JQ362547 | Oyster | Oyster | Ireland | 2010 | 2011 | 3           | 302 |  | GII.12 |
| 506 | JQ362548 | Oyster | Oyster | Ireland | 2010 | 2011 | 3           | 302 |  | GII.4  |
| 507 | JQ362549 | Oyster | Oyster | Ireland | 2010 | 2011 | 3           | 302 |  | GII.6  |
| 508 | JQ362550 | Oyster | Oyster | Ireland | 2010 | 2011 | 3           | 302 |  | GII.4  |
| 509 | JQ362551 | Oyster | Oyster | Ireland | 2010 | 2011 | 3           | 302 |  | GII.12 |
| 510 | JQ362552 | Oyster | Oyster | Ireland | 2010 | 2011 | 3           | 302 |  | GII.4  |

|     |          |        |        |             |      |      |    |     |  |       |
|-----|----------|--------|--------|-------------|------|------|----|-----|--|-------|
| 511 | JQ362553 | Oyster | Oyster | Ireland     | 2010 | 2011 | 3  | 302 |  | GII.3 |
| 512 | JQ362564 | Oyster | Oyster | Ireland     | 2010 | 2011 | 3  | 291 |  | GI.7  |
| 513 | JQ362565 | Oyster | Oyster | Ireland     | 2010 | 2011 | 3  | 291 |  | GI.4  |
| 514 | JQ362566 | Oyster | Oyster | Ireland     | 2010 | 2011 | 3  | 291 |  | GI.5  |
| 515 | JQ362567 | Oyster | Oyster | Ireland     | 2010 | 2011 | 3  | 291 |  | GI.6  |
| 516 | JQ362580 | Oyster | Oyster | Ireland     | 2010 | 2011 | 3  | 291 |  | GI.4  |
| 517 | JQ362581 | Oyster | Oyster | Ireland     | 2010 | 2011 | 3  | 291 |  | GI.7  |
| 518 | JQ362582 | Oyster | Oyster | Ireland     | 2010 | 2011 | 3  | 291 |  | GI.4  |
| 519 | JQ362583 | Oyster | Oyster | Ireland     | 2010 | 2011 | 3  | 291 |  | GI.4  |
| 520 | JQ362584 | Oyster | Oyster | Ireland     | 2010 | 2011 | 3  | 291 |  | GI.4  |
| 521 | JQ362585 | Oyster | Oyster | Ireland     | 2010 | 2011 | 3  | 291 |  | GI.4  |
| 522 | JQ362586 | Oyster | Oyster | Ireland     | 2010 | 2011 | 3  | 291 |  | GI.4  |
| 523 | JQ362587 | Oyster | Oyster | Ireland     | 2010 | 2011 | 3  | 291 |  | GI.4  |
| 524 | JQ362588 | Oyster | Oyster | Ireland     | 2010 | 2011 | 3  | 291 |  | GI.4  |
| 525 | JQ362589 | Oyster | Oyster | Ireland     | 2010 | 2011 | 3  | 291 |  | GI.4  |
| 526 | JQ362590 | Oyster | Oyster | Ireland     | 2010 | 2011 | 3  | 291 |  | GI.6  |
| 527 | JQ362591 | Oyster | Oyster | Ireland     | 2010 | 2011 | 3  | 291 |  | GI.4  |
| 528 | JQ362592 | Oyster | Oyster | Ireland     | 2010 | 2011 | 3  | 291 |  | GI.1  |
| 529 | JQ362593 | Oyster | Oyster | Ireland     | 2010 | 2011 | 3  | 291 |  | GI.4  |
| 530 | JQ362594 | Oyster | Oyster | Ireland     | 2010 | 2011 | 3  | 291 |  | GI.6  |
| 531 | KC262648 | Oyster | Oyster | South Korea | 2011 | 2012 | 13 | 582 |  | GII.2 |
| 532 | KC262649 | Oyster | Oyster | South Korea | 2011 | 2012 | 13 | 582 |  | GII.2 |
| 533 | KC262650 | Oyster | Oyster | South Korea | 2012 | 2012 | 13 | 582 |  | GII.2 |
| 534 | KC262651 | Oyster | Oyster | South Korea | 2012 | 2012 | 13 | 582 |  | GII.4 |
| 535 | KC262652 | Oyster | Oyster | South Korea | 2012 | 2012 | 13 | 582 |  | GII.2 |
| 536 | KC262653 | Oyster | Oyster | South Korea | 2012 | 2012 | 13 | 582 |  | GII.2 |
| 537 | KC262654 | Oyster | Oyster | South Korea | 2011 | 2012 | 13 | 582 |  | GII.2 |
| 538 | KC262655 | Oyster | Oyster | South Korea | 2011 | 2012 | 13 | 582 |  | GII.2 |
| 539 | KC262656 | Oyster | Oyster | South Korea | 2011 | 2012 | 13 | 582 |  | GII.2 |
| 540 | KC262657 | Oyster | Oyster | South Korea | 2011 | 2012 | 13 | 582 |  | GII.2 |
| 541 | KC262658 | Oyster | Oyster | South Korea | 2011 | 2012 | 13 | 582 |  | GII.2 |
| 542 | KC262659 | Oyster | Oyster | South Korea | 2011 | 2012 | 13 | 582 |  | GII.2 |
| 543 | KC262660 | Oyster | Oyster | South Korea | 2011 | 2012 | 13 | 582 |  | GII.4 |
| 544 | KC262661 | Oyster | Oyster | South Korea | 2011 | 2012 | 13 | 582 |  | GII.4 |
| 545 | KC262662 | Oyster | Oyster | South Korea | 2011 | 2012 | 13 | 582 |  | GII.4 |
| 546 | KC262663 | Oyster | Oyster | South Korea | 2012 | 2012 | 13 | 582 |  | GII.2 |
| 547 | KC262664 | Oyster | Oyster | South Korea | 2011 | 2012 | 13 | 582 |  | GII.4 |
| 548 | KC262665 | Oyster | Oyster | South Korea | 2011 | 2012 | 13 | 582 |  | GII.2 |
| 549 | KC262666 | Oyster | Oyster | South Korea | 2011 | 2012 | 13 | 582 |  | GII.2 |
| 550 | KC262667 | Oyster | Oyster | South Korea | 2011 | 2012 | 13 | 582 |  | GII.4 |
| 551 | KC954402 | Human  | Oyster | Ireland     | 2012 | 2013 | 14 | 291 |  | GI.6  |
| 552 | KC954403 | Human  | Oyster | Ireland     | 2012 | 2013 | 14 | 291 |  | GI.2  |
| 553 | KC954404 | Human  | Oyster | Ireland     | 2012 | 2013 | 14 | 291 |  | GI.4  |

|     |          |        |        |         |      |      |    |     |  |        |
|-----|----------|--------|--------|---------|------|------|----|-----|--|--------|
| 554 | KC954405 | Human  | Oyster | Ireland | 2012 | 2013 | 14 | 291 |  | GI.4   |
| 555 | KC954406 | Human  | Oyster | Ireland | 2012 | 2013 | 14 | 291 |  | GI.6   |
| 556 | KC954407 | Human  | Oyster | Ireland | 2012 | 2013 | 14 | 291 |  | GI.4   |
| 557 | KC954408 | Human  | Oyster | Ireland | 2012 | 2013 | 14 | 291 |  | GI.1   |
| 558 | KC954409 | Human  | Oyster | Ireland | 2012 | 2013 | 14 | 291 |  | GI.6   |
| 559 | KC954410 | Human  | Oyster | Ireland | 2012 | 2013 | 14 | 291 |  | GI.1   |
| 560 | KC954411 | Human  | Oyster | Ireland | 2012 | 2013 | 14 | 291 |  | GI.1   |
| 561 | KC954412 | Human  | Oyster | Ireland | 2012 | 2013 | 14 | 291 |  | GI.4   |
| 562 | KC954413 | Human  | Oyster | Ireland | 2012 | 2013 | 14 | 291 |  | GI.4   |
| 563 | KC954414 | Human  | Oyster | Ireland | 2012 | 2013 | 14 | 291 |  | GI.4   |
| 564 | KC954415 | Human  | Oyster | Ireland | 2012 | 2013 | 14 | 291 |  | GI.4   |
| 565 | KC954416 | Oyster | Oyster | Ireland | 2010 | 2013 | 14 | 291 |  | GI.4   |
| 566 | KC954417 | Oyster | Oyster | Ireland | 2010 | 2013 | 14 | 291 |  | GI.4   |
| 567 | KC954418 | Oyster | Oyster | Ireland | 2010 | 2013 | 14 | 291 |  | GI.4   |
| 568 | KC954419 | Oyster | Oyster | Ireland | 2010 | 2013 | 14 | 291 |  | GI.4   |
| 569 | KC954420 | Oyster | Oyster | Ireland | 2012 | 2013 | 14 | 291 |  | GI.4   |
| 570 | KC954421 | Oyster | Oyster | Ireland | 2012 | 2013 | 14 | 291 |  | GI.4   |
| 571 | KC954422 | Oyster | Oyster | Ireland | 2012 | 2013 | 14 | 291 |  | GI.4   |
| 572 | KC954423 | Oyster | Oyster | Ireland | 2012 | 2013 | 14 | 291 |  | GI.4   |
| 573 | KC954424 | Oyster | Oyster | Ireland | 2012 | 2013 | 14 | 291 |  | GI.4   |
| 574 | KC954425 | Oyster | Oyster | Ireland | 2012 | 2013 | 14 | 291 |  | GI.4   |
| 575 | KC954426 | Oyster | Oyster | Ireland | 2012 | 2013 | 14 | 291 |  | GI.4   |
| 576 | KC954427 | Oyster | Oyster | Ireland | 2012 | 2013 | 14 | 291 |  | GI.4   |
| 577 | KC954428 | Oyster | Oyster | Ireland | 2012 | 2013 | 14 | 291 |  | GI.1   |
| 578 | KC954429 | Oyster | Oyster | Ireland | 2012 | 2013 | 14 | 291 |  | GI.4   |
| 579 | KC954430 | Oyster | Oyster | Ireland | 2012 | 2013 | 14 | 291 |  | GI.4   |
| 580 | KC954431 | Oyster | Oyster | Ireland | 2012 | 2013 | 14 | 294 |  | GI.NA  |
| 581 | KC954432 | Oyster | Oyster | Ireland | 2012 | 2013 | 14 | 291 |  | GI.2   |
| 582 | KC954433 | Oyster | Oyster | Ireland | 2012 | 2013 | 14 | 294 |  | GI.NA  |
| 583 | KC954434 | Oyster | Oyster | Ireland | 2012 | 2013 | 14 | 291 |  | GI.3   |
| 584 | KC954435 | Oyster | Oyster | Ireland | 2010 | 2013 | 14 | 302 |  | GII.3  |
| 585 | KC954436 | Oyster | Oyster | Ireland | 2010 | 2013 | 14 | 302 |  | GII.3  |
| 586 | KC954437 | Oyster | Oyster | Ireland | 2010 | 2013 | 14 | 302 |  | GII.3  |
| 587 | KC954438 | Oyster | Oyster | Ireland | 2010 | 2013 | 14 | 302 |  | GII.13 |
| 588 | KC954439 | Oyster | Oyster | Ireland | 2010 | 2013 | 14 | 302 |  | GII.3  |
| 589 | KC954440 | Oyster | Oyster | Ireland | 2010 | 2013 | 14 | 302 |  | GII.3  |
| 590 | KC954441 | Oyster | Oyster | Ireland | 2010 | 2013 | 14 | 302 |  | GII.13 |
| 591 | KC954442 | Oyster | Oyster | Ireland | 2010 | 2013 | 14 | 302 |  | GII.13 |
| 592 | KC954443 | Oyster | Oyster | Ireland | 2010 | 2013 | 14 | 302 |  | GII.12 |
| 593 | KC954444 | Oyster | Oyster | Ireland | 2010 | 2013 | 14 | 302 |  | GII.12 |
| 594 | KC954445 | Oyster | Oyster | Ireland | 2010 | 2013 | 14 | 302 |  | GII.12 |
| 595 | KC954446 | Oyster | Oyster | Ireland | 2010 | 2013 | 14 | 302 |  | GII.13 |
| 596 | KC954447 | Oyster | Oyster | Ireland | 2010 | 2013 | 14 | 302 |  | GII.3  |

|     |                                 |        |        |             |      |      |         |     |         |        |
|-----|---------------------------------|--------|--------|-------------|------|------|---------|-----|---------|--------|
| 597 | KC954448                        | Oyster | Oyster | Ireland     | 2010 | 2013 | 14      | 302 |         | GII.3  |
| 598 | KC954449                        | Oyster | Oyster | Ireland     | 2010 | 2013 | 14      | 302 |         | GII.3  |
| 599 | KC954450                        | Oyster | Oyster | Ireland     | 2010 | 2013 | 14      | 302 |         | GII.13 |
| 600 | KC954451                        | Oyster | Oyster | Ireland     | 2010 | 2013 | 14      | 302 |         | GII.13 |
| 601 | KC954452                        | Oyster | Oyster | Ireland     | 2010 | 2013 | 14      | 302 |         | GII.4  |
| 602 | KC954453                        | Human  | Oyster | Ireland     | 2012 | 2013 | 14      | 302 |         | GII.1  |
| 603 | KC954454                        | Human  | Oyster | Ireland     | 2012 | 2013 | 14      | 302 |         | GII.1  |
| 604 | KC954455                        | Human  | Oyster | Ireland     | 2012 | 2013 | 14      | 302 |         | GII.1  |
| 605 | KC954456                        | Human  | Oyster | Ireland     | 2012 | 2013 | 14      | 302 |         | GII.1  |
| 606 | KC954457                        | Human  | Oyster | Ireland     | 2012 | 2013 | 14      | 302 |         | GII.7  |
| 607 | KC954458                        | Human  | Oyster | Ireland     | 2012 | 2013 | 14      | 302 |         | GII.1  |
| 608 | KC954459                        | Human  | Oyster | Ireland     | 2012 | 2013 | 14      | 302 |         | GII.1  |
| 609 | KC954460                        | Human  | Oyster | Ireland     | 2012 | 2013 | 14      | 302 |         | GII.1  |
| 610 | KC954461                        | Human  | Oyster | Ireland     | 2012 | 2013 | 14      | 302 |         | GII.1  |
| 611 | KC954462                        | Human  | Oyster | Ireland     | 2012 | 2013 | 14      | 302 |         | GII.1  |
| 612 | KC954463                        | Human  | Oyster | Ireland     | 2012 | 2013 | 14      | 302 |         | GII.1  |
| 613 | KC954464                        | Human  | Oyster | Ireland     | 2012 | 2013 | 14      | 302 |         | GII.1  |
| 614 | KC954465                        | Oyster | Oyster | Ireland     | 2012 | 2013 | 14      | 302 |         | GII.4  |
| 615 | KC954466                        | Oyster | Oyster | Ireland     | 2012 | 2013 | 14      | 302 |         | GII.1  |
| 616 | KC954467                        | Oyster | Oyster | Ireland     | 2012 | 2013 | 14      | 302 |         | GII.3  |
| 617 | KC954468                        | Oyster | Oyster | Ireland     | 2012 | 2013 | 14      | 302 |         | GII.6  |
| 618 | KC954469                        | Oyster | Oyster | Ireland     | 2012 | 2013 | 14      | 302 |         | GII.6  |
| 619 | KC954470                        | Oyster | Oyster | Ireland     | 2012 | 2013 | 14      | 302 |         | GII.7  |
| 620 | KC954471                        | Oyster | Oyster | Ireland     | 2012 | 2013 | 14      | 302 |         | GII.7  |
| 621 | KC954472                        | Oyster | Oyster | Ireland     | 2012 | 2013 | 14      | 302 |         | GII.1  |
| 622 | MLT1_1_07_23457_seq_1           | Human  | Oyster | Italy       | 2007 | 2007 | Noronet | 191 |         | GII.4  |
| 623 | MLT1_1_07_23457_seq_2           | Human  | Oyster | Italy       | 2007 | 2007 | Noronet | 183 | GII.P4  |        |
| 624 | OB-12-103105-AK-314_37954_seq_1 |        | Oyster | New Zealand | 2012 | 2012 | Noronet | 172 | GII.P16 |        |
| 625 | OB-12-103105-AK-314_37954_seq_2 |        | Oyster | New Zealand | 2012 | 2012 | Noronet | 283 |         | GII.13 |
| 626 | OB-12-103157-TG-355-_GI_37961_  | Human  | Oyster | New Zealand | 2012 | 2012 | Noronet | 275 |         | GI.3   |
| 627 | OB-12-103157-TG-355-GII_37960_1 | Human  | Oyster | New Zealand | 2012 | 2012 | Noronet | 172 | GII.P22 |        |
| 628 | OB-12-103157-TG-355-GII_37960_2 | Human  | Oyster | New Zealand | 2012 | 2012 | Noronet | 262 |         | GII.5  |
| 629 | OB-12-103157-TG-362_37962_seq_1 | Human  | Oyster | New Zealand | 2012 | 2012 | Noronet | 172 | GII.Pg  |        |
| 630 | OB-12-103157-TG-362_37962_seq_2 | Human  | Oyster | New Zealand | 2012 | 2012 | Noronet | 283 |         | GII.12 |
| 631 | OB-12-103157-TG-363_37963_seq_1 | Human  | Oyster | New Zealand | 2012 | 2012 | Noronet | 147 | GI.Pa   |        |
| 632 | OB-12-103157-TG-363_37963_seq_2 | Human  | Oyster | New Zealand | 2012 | 2012 | Noronet | 295 |         | GI.3   |
| 633 | OB-12-103157-TG-364_37964_seq_1 | Human  | Oyster | New Zealand | 2012 | 2012 | Noronet | 147 | GI.Pa   |        |
| 634 | OB-12-103157-TG-364_37964_seq_2 | Human  | Oyster | New Zealand | 2012 | 2012 | Noronet | 296 |         | GI.3   |
| 635 | OB-12-103157-TG-368_37965_seq_1 | Human  | Oyster | New Zealand | 2012 | 2012 | Noronet | 173 | GII.P22 |        |
| 636 | OB-12-103157-TG-368_37965_seq_2 | Human  | Oyster | New Zealand | 2012 | 2012 | Noronet | 233 |         | GII.5  |
| 637 | OB-13-103750-AK-161_40818_seq_1 | Human  | Oyster | New Zealand | 2013 | 2013 | Noronet | 172 | GI.P4   |        |
| 638 | OB-13-103750-AK-161_40818_seq_2 | Human  | Oyster | New Zealand | 2013 | 2013 | Noronet | 295 |         | GI.4   |
| 639 | SE_2004_01_11130_seq_1          | Human  | Oyster | Sweden      | 2004 | 2004 | Noronet | 291 |         | GI.6   |

|     |                             |        |        |             |      |      |             |      |         |        |
|-----|-----------------------------|--------|--------|-------------|------|------|-------------|------|---------|--------|
| 640 | SE_2004_01_11130_seq_2      | Human  | Oyster | Sweden      | 2004 | 2004 | Noronet     | 284  | GI.Pb   |        |
| 641 | SE2011_1148_34558_seq_1     | Human  | Oyster | Sweden      | 2011 | 2011 | Noronet     | 282  |         | GII.7  |
| 642 | SE2011_1165_36647_seq_1     | Human  | Oyster | Sweden      | 2011 | 2012 | Noronet     | 291  |         | GI.4   |
| 643 | SE2011_1165_36647_seq_2     | Human  | Oyster | Sweden      | 2011 | 2012 | Noronet     | 338  |         | GII.3  |
| 644 | SE2011_1165_36647_seq_3     | Human  | Oyster | Sweden      | 2011 | 2012 | Noronet     | 285  | GII.P21 |        |
| 645 | SE2011_1206_36688_seq_1     | Human  | Oyster | Sweden      | 2011 | 2012 | Noronet     | 291  |         | GI.1   |
| 646 | TAR1711_39478_seq_1         | Human  | Oyster | Spain       | 2011 | 2013 | Noronet     | 279  |         | GII.6  |
| 647 | TAR1711b_39479_seq_1        | Human  | Oyster | Spain       | 2011 | 2013 | Noronet     | 274  |         | GII.4  |
| 648 | TAS5156_42848_seq_1         | Human  | Oyster | Australia   | 2013 | 2014 | Noronet     | 266  |         | GII.1  |
| 649 | TH0103_10320_seq_1          | Human  | Oyster | France      | 2002 | 2003 | Noronet     | 291  |         | GI.4   |
| 650 | TH0103_10320_seq_2          | Human  | Oyster | France      | 2002 | 2003 | Noronet     | 69   | GII.PNA |        |
| 651 | U34381                      | Human  | Oyster | New Zealand | 1995 | 1995 | Unpublished | 332  | GII.P3  |        |
| 652 | U46039                      | Human  | Oyster | New Zealand | 1995 | 1995 | Unpublished | 1698 |         | GII.3  |
| 653 | UTE0610_39448_seq_1         | Human  | Oyster | Spain       | 2010 | 2013 | Noronet     | 256  |         | GII.12 |
| 654 | UVEVV12211_39482_seq_1      | Human  | Oyster | Spain       | 2011 | 2013 | Noronet     | 316  |         | GII.4  |
| 655 | UVEVV12211b_42069_seq_1     | Human  | Oyster | Spain       | 2011 | 2013 | Noronet     | 316  |         | GII.4  |
| 656 | UVEVV12211c_42082_seq_1     | Human  | Oyster | Spain       | 2011 | 2013 | Noronet     | 274  |         | GII.4  |
| 657 | UVEVV12611_42053_seq_1      | Human  | Oyster | Spain       | 2011 | 2013 | Noronet     | 194  |         | GII.4  |
| 658 | VWA_O13-326_43482_seq_1     | Oyster | Oyster | Netherlands | 2013 | 2014 | Noronet     | 195  | GII.Pe  |        |
| 659 | VWA_O13-326_43482_seq_2     | Oyster | Oyster | Netherlands | 2013 | 2014 | Noronet     | 203  |         | GI.4   |
| 660 | VWA_O13-749ABCD_43478_seq_1 | Oyster | Oyster | Netherlands | 2013 | 2014 | Noronet     | 195  | GII.P4  |        |
| 661 | VWA_O13-749ABCD_43478_seq_2 | Oyster | Oyster | Netherlands | 2013 | 2014 | Noronet     | 195  | GII.Pe  |        |
| 662 | VWA_O13-749ABCD_43478_seq_3 | Oyster | Oyster | Netherlands | 2013 | 2014 | Noronet     | 195  | GII.P4  |        |
| 663 | VWA_O13-749ABCD_43478_seq_4 | Oyster | Oyster | Netherlands | 2013 | 2014 | Noronet     | 204  |         | GI.4   |
| 664 | VWA_O13-832_43476_seq_1     | Oyster | Oyster | Netherlands | 2013 | 2014 | Noronet     | 195  | GII.P4  |        |
| 665 | VWA_O-872_43479_seq_1       | Oyster | Oyster | Netherlands | 2013 | 2014 | Noronet     | 195  | GII.P4  |        |

**Table S2** Five bacterial 16S rRNA gene sequences deposited in Noronet.

| Accession            | Sample | Source | Country | Isolate time | Submit time | Reference | Length /nt | Blast result                                                                          |
|----------------------|--------|--------|---------|--------------|-------------|-----------|------------|---------------------------------------------------------------------------------------|
| 93DE0113_40994_seq_2 | Human  | Oyster | France  | 2013         | 2013        | Noronet   | 300        | Bacteroides xylanisolvens XB1A draft genome                                           |
| 29CH1212_41006_seq_1 | Human  | Oyster | France  | 2012         | 2013        | Noronet   | 271        | Bacteroides xylanisolvens XB1A draft genome                                           |
| 44AN0313_41177_seq_1 | Human  | Oyster | France  | 2013         | 2013        | Noronet   | 283        | Uncultured organism clone 1041059764609 genomic sequence                              |
| 56GU1212_40992_seq_1 | Human  | Oyster | France  | 2013         | 2013        | Noronet   | 72         | Uncultured bacterium clone RL187_aan78b07 16S ribosomal RNA gene, partial sequence    |
| 56GU1212_40992_seq_2 | Human  | Oyster | France  | 2013         | 2013        | Noronet   | 75         | Uncultured bacterium clone 16slp48-04e06.p1k 16S ribosomal RNA gene, partial sequence |

## References

1. Sdiri - Loulizi K, Hassine M, Aouni Z, et al. Detection and molecular characterization of enteric viruses in environmental samples in Monastir, Tunisia between January 2003 and April 2007[J]. *Journal of applied microbiology*, 2010, 109(3): 1093-1104.
2. Sugieda M, Nakajima K, Nakajima S. Outbreaks of Norwalk-like virus-associated gastroenteritis traced to shellfish: coexistence of two genotypes in one specimen[J]. *Epidemiology and infection*, 1996, 116(03): 339-346.
3. Rajko-Nenow P, Waters A, Keaveney S, et al. Norovirus genotypes present in oysters and in effluent from a wastewater treatment plant during the seasonal peak of infections in Ireland in 2010[J]. *Applied and environmental microbiology*, 2013, 79(8): 2578-2587.
4. Iizuka S, Oka T, Tabara K, et al. Detection of sapoviruses and noroviruses in an outbreak of gastroenteritis linked genetically to shellfish[J]. *Journal of medical virology*, 2010, 82(7): 1247-1254.
5. Nishida T, Kimura H, Saitoh M, et al. Detection, quantitation, and phylogenetic analysis of noroviruses in Japanese oysters[J]. *Applied and environmental microbiology*, 2003, 69(10): 5782-5786.
6. Nishida T, Nishio O, Kato M, et al. Genotyping and quantitation of noroviruses in oysters from two distinct sea areas in Japan[J]. *Microbiology and immunology*, 2007, 51(2): 177-184.
7. Cheng P K C, Wong D K K, Chung T W H, et al. Norovirus contamination found in oysters worldwide[J]. *Journal of medical virology*, 2005, 76(4): 593-597.
8. Symes S J, Gunsekere I C, Marshall J A, et al. Norovirus mixed infection in an oyster-associated outbreak: an opportunity for recombination[J]. *Archives of virology*, 2007, 152(6): 1075-1086.
9. David S T, McIntyre L, MacDougall L, et al. An outbreak of norovirus caused by consumption of oysters from geographically dispersed harvest sites, British Columbia, Canada, 2004[J]. *Foodborne Pathogens and Disease*, 2007, 4(3): 349-358.
10. Wang D, Wu Q, Yao L, et al. New target tissue for food - borne virus detection in oysters[J]. *Letters in applied microbiology*, 2008, 47(5): 405-409.
11. Williams-Woods J, González-Escalona N, Burkhardt W. Direct sequencing of hepatitis A virus and norovirus RT-PCR products from environmentally contaminated oyster using M13-tailed primers[J]. *Journal of virological methods*, 2011, 178(1): 253-257.
12. Nenonen N P, Hannoun C, Olsson M B, et al. Molecular analysis of an oyster-related norovirus outbreak[J]. *Journal of Clinical Virology*, 2009, 45(2):

105-108.

13. Han T H, Kim S C, Kim S T, et al. Detection of norovirus genogroup IV, klassevirus, and pepper mild mottle virus in sewage samples in South Korea[J]. Archives of virology, 2014, 159(3): 457-463.
14. Rajko-Nenow P, Keaveney S, Flannery J, et al. Norovirus genotypes implicated in two oyster-related illness outbreaks in Ireland[J]. Epidemiology and infection, 2014, 142(10): 2096-2104.
15. McIntyre L, Galanis E, Mattison K, et al. Multiple clusters of norovirus among shellfish consumers linked to symptomatic oyster harvesters[J]. Journal of Food Protection®, 2012, 75(9): 1715-1720.
16. Seto Y, Iritani N, Kubo H, et al. Genotyping of norovirus strains detected in outbreaks between April 2002 and March 2003 in Osaka City, Japan[J]. Microbiology and immunology, 2005, 49(3): 275-283.
